# Supplementary material for: NAFLD Diagnostic Nomogram for Community-Dwelling Elderly Using Routine Parameters
Source: Research Square preprint supplement (doi:10.21203/rs.3.rs-6715747/v1), 2025-06-25
Supplement: Supplementary file 1 [file 7150ac2e186d129a5168067a.xlsx]

## Sheet: 1
ID	Sex	Age(Y)	weight(kg)	height(cm)	Body Mass Index(kg/m²)	SBP(mmHg)	DBP(mmHg)	waist(cm)	smoke	alcohol（g/day）	Physical activity level	Hypertension	Type2diabetes	HGB	WBC	PLT	FPG	HbA1c	Crumoll	BUNmmoll	UAumoll	TCmmolL	TGmmolL	LDLmmolL	HDLmmolL	HCYumolL	Liver ultrasound
1	0	65	48.6	148	22.1877	139	66	88	0	0	2	0	1	130	5.47	175	7.4	6.5	55	4.31	361	4.44	1.24	2.36	1.37	18.34	0
2	0	73	57.5	163.5	21.5096	141	69	81	0	0	2	1	0	131	6.21	334	4.6	5.8	45	5.3	149	5.99	1.4	3.62	1.97	16.1	1
3	0	74	48.3	149.5	21.6105	153	75	78	0	0	2	1	1	143	5.03	166	6.15	5.9	48	4.43	303	4.64	2.67	1.98	1.28	10.27	0
4	0	83	46	132	26.4004	170	90	93	0	0	2	0	0	135	8.3	245	4.88	5.7	64	4.3	273	5.19	1.64	2.56	1.62	11.66	0
5	0	69	53.6	157.5	21.6075	132	85	87	0	0	2	0	0	127	7.92	181	4.8	5.6	56	5.5	310	5.06	0.58	3.51	1.48	11.43	0
6	0	67	49.3	143	24.1088	175	85	81	0	0	2	0	0	136	5.16	280	5.33	5.7	75	4.1	240	6.63	1.3	3.06	1.96	11.56	0
7	0	85	50.2	142	24.8959	166	76	93	0	0	2	1	0	140	5.4	328	6.55	6.3	66	4.51	347	5.43	0.81	2.97	2.07	13.84	1
8	0	69	51.8	148	23.6486	135	60	85	0	0	2	0	0	132	7.48	199	5.52	6	55	7.74	345	5.24	1.65	2.98	1.79	13.45	1
9	0	72	33.9	147.5	15.5817	137	69	63	0	0	2	0	0	113	6.04	221	4.33	5.4	55	6.58	220	6.46	1.03	3.91	2.26	9.41	0
10	0	72	71	162.5	26.8876	155	86	82.5	0	0	2	0	0	118	5.4	249	5.36	5.7	66	5.37	250	5.35	0.8	2.57	1.8	10.25	0
11	0	68	65.5	160.5	25.4268	134	68	92	0	0	2	1	0	142	5.75	380	5.41	5.8	60	5.69	313	5.84	1.87	3.29	1.85	12.42	1
12	0	71	74.3	161.5	28.4868	156	67	94	0	0	2	0	0	117	4.51	266	6.21	6.5	52	5.85	462	8.3	1.68	4.74	2.97	17.32	1
13	0	70	61.8	156.5	25.2325	128	67	90	0	0	2	0	0	123	6.14	334	4.4	5.6	63	7.15	400	5.94	0.95	3.32	2.02	11.99	1
14	0	67	57.7	147.5	26.5211	134	73	91	0	0	2	0	0	130	5.44	288	6.37	6.8	67	7.1	207	5.55	0.87	3.43	1.58	16.17	1
15	0	67	62.3	153	26.6137	123	65	92	0	0	2	0	0	126	4.72	140	5.22	5	53	6.43	232	4.67	4.05	2.59	1.96	11.26	1
16	0	68	71	152	30.7306	132	75	102	0	0	2	0	0	142	6.61	241	4.35	5.9	84	6.2	347	5.69	1.8	3.03	1.9	13.72	1
17	0	68	58.9	155.5	24.3587	172	80	83	0	0	2	0	0	138	6.74	295	5.65	5.9	71	6.67	391	6.27	1.35	3.77	2.32	16.26	0
18	1	68	69.6	171	23.8022	120	73	94	0	0	2	0	0	134	6.11	321	5.28	5.9	67	4.54	379	5.34	2.29	2.95	1.81	10.77	1
19	0	69	45.6	150	20.2667	133	65	77	0	0	2	0	0	134	8.31	248	7.7	7.5	63	6.59	277	5.03	1.19	2.42	1.64	12.12	0
20	1	67	71.3	168.5	25.1125	144	76	88	0	25	2	0	0	152	8.67	212	4.74	5.9	59	3.9	445	7.25	2.73	3.97	2.32	17.03	0
21	1	66	76	176	24.5351	141	78	95	0	0	2	1	0	167	7.56	295	6.42	7.4	79	5.13	309	6.52	2.44	3.65	2.24	15.25	0
22	0	89	42.5	148.5	19.2724	131	72	77	0	0	2	1	0	121	6.43	333	5.59	6.7	74	7.64	441	7.07	1.53	3.92	2.38	20.14	0
23	1	65	71.4	167.5	25.4489	107	72	94	0	0	2	0	1	155	6.41	203	6.98	6.9	79	5.9	323	5.54	1.36	3.22	2.02	14.98	1
24	1	81	61.3	160.5	23.7964	104	48	95	0	0	2	1	0	138	6.29	229	5.47	5.8	101	7.47	334	4.38	1.93	1.63	1.13	16.57	1
25	1	68	68	162	25.9107	122	61	92	1	0	2	0	0	155	5.96	180	5.15	5.9	95	7.65	374	4.37	5.26	1.69	0.94	14.33	0
26	1	67	63.7	168	22.5694	107	56	91	1	0	2	0	0	133	5.64	265	4.94	5.7	79	4.88	320	4.88	0.99	2.89	1.68	19.66	0
27	0	67	62	158.5	24.6793	157	73	89	0	0	2	0	0	130	4.59	206	5.34	5.7	54	4.69	367	3.54	2.63	1.56	0.99	13.27	1
28	0	86	62.5	161.5	23.9627	179	71	98	0	0	2	0	0	119	6.86	248	5.42	5.7	66	5.5	318	5.12	0.78	3.03	1.83	20.3	0
29	0	67	64.1	155	26.6805	129	84	89	1	0	2	0	0	139	4.33	188	5.05	5.6	75	7.23	249	3.85	0.82	1.58	1.11	17.96	1
30	1	69	62.7	173	20.9496	145	80	85	0	5	2	0	0	144	5.7	230	5.03	5.7	75	5.45	252	6.04	0.57	2.73	1.95	16.01	0
31	0	79	67.6	163.5	25.2878	137	60	86	0	0	2	1	1	150	8.02	283	7.78	6.2	67	6.17	297	4.66	1.41	1.98	1.44	15.78	0
32	1	73	56.7	168	20.0893	135	63	79	0	0	2	1	1	138	4.67	222	6.54	6.3	71	8.08	375	4.91	0.59	2.24	1.43	16.89	0
33	1	64	71.5	162	27.2443	110	65	94	1	0	2	0	0	149	7.1	175	5.35	5.8	71	4.77	501	6.38	1.71	3.7	2.09	12.04	1
34	0	74	44	146	20.6418	128	74	73	0	0	2	0	1	139	6.09	243	6.77	6.5	62	7.33	452	5	1.44	3.45	1.14	12.89	0
35	1	68	65.9	164.5	24.3531	139	80	88	0	0	2	0	0	152	6.98	295	4.85	5.7	114	7.14	308	6.79	2.2	3.82	2.38	17.69	1
36	0	69	55.2	158.5	21.9726	122	68	84	0	0	2	0	0	125	8.19	187	4.11	5.5	60	6.41	404	6.08	1.01	3.34	2.11	11.43	0
37	1	70	65.2	161.5	24.9978	150	74	91	0	0	2	0	0	136	6.77	238	5.34	6	87	2.58	289	3.79	1.37	1.8	1.11	12.47	0
38	1	70	59.2	166	21.4835	122	76	79	0	0	2	0	0	138	4.24	244	5	5.7	80	6.22	308	6.07	1.19	3.41	2.11	14.64	0
40	0	69	63.4	154.5	26.5603	118	73	97	0	0	2	0	1	144	7.96	204	6.82	6.3	60	5.66	280	4.24	2.14	1.8	1.15	10.72	1
41	0	73	58	163.5	21.6966	141	69	81	0	0	2	1	0	132	6.51	221	5.1	6	79	5.6	420	3.8	1.1	1.9	1.2	16.1	0
42	0	69	48.8	158	19.5481	114	69	76	0	0	2	0	0	129	3.5	199	5.44	5.6	72	8.97	307	5.85	0.97	3.05	1.89	12.95	0
43	0	64	83.2	170.5	28.6203	122	65	104	0	0	2	0	1	154	6.76	316	10.87	9.4	78	10.39	479	3.9	5.42	1.65	0.91	16.7	1
44	1	66	80.2	174	26.4896	129	82	103	0	5	2	1	0	153	8.23	167	5.06	5.9	71	5.91	464	6.02	1.42	3.38	1.36	14.03	1
45	0	67	61	156	25.0657	137	76	84	0	0	2	0	0	133	4.86	260	4.34	5.5	88	5.28	378	7.55	0.98	3.99	2.09	12.48	0
46	1	69	62	163	23.3355	115	72	90	1	0	2	1	1	142	6.5	305	8.49	7.5	89	5.62	214	3.57	1.03	1.7	1.11	12.33	1
47	0	69	59.4	154	25.0464	150	78	81	0	0	2	1	0	147	7.19	251	5.12	6.2	78	6.04	397	4.64	1.48	2	1.9	12.68	0
48	1	68	67.6	162.5	25.6	124	81	92	1	0	2	0	0	143	7.48	291	6.65	6.7	95	6.49	518	3.75	2.57	1.81	0.88	18.94	1
49	0	73	58.2	155	24.2248	125	64	82	0	0	2	0	0	138	9.67	275	5.57	6.1	58	4.27	221	5.01	0.77	2.28	2.02	10.97	0
50	1	73	59	163	22.2063	151	78	82	1	25	2	0	0	140	4.91	152	4.83	4.8	81	5.74	435	5.06	1.69	2.94	0.94	19.89	0
51	1	67	60	175	19.5918	131	76	74	1	0	2	0	0	140	9.86	262	5.46	6	82	7.19	311	5.42	0.62	3	1.49	19.78	0
52	0	68	51.5	152	22.2905	127	75	78	0	0	2	1	0	125	4.76	172	5.08	6	65	6.36	344	5.27	1.86	2.83	1.1	9.74	0
53	1	67	58.6	175.5	19.0258	109	60	70	0	5	2	0	0	132	4.9	207	4.48	5.5	75	5.28	560	5.57	1.06	2.89	1.72	14.23	0
54	0	67	55	158	22.0317	142	84	84	0	0	2	1	1	153	7.06	187	4.46	5.8	59	4.75	311	5.91	6.9	2.39	0.97	9.21	1
55	0	66	74.5	153.5	31.6184	172	100	106	0	0	2	1	1	146	9.15	350	7.28	7.2	62	4.46	451	7.57	3.53	4.09	1.18	13.66	0
56	0	67	50.3	156	20.669	125	76	81	0	0	2	1	1	143	7.4	284	4.82	6	57	6.68	374	6.43	1.65	3.88	1.25	19.16	0
57	0	79	49	151	21.4903	121	71	76	0	0	2	0	0	129	5.05	231	5.27	5.7	69	4.01	267	5.92	1.09	3.65	1.07	11.55	0
58	1	81	55.8	163	21.0019	159	67	87	1	0	2	0	0	130	8.62	220	4.55	5.6	156	9.07	396	3.54	0.85	1.79	1.21	23.15	0
59	0	90	47.5	160	18.5547	154	68	85	0	0	2	1	0	109	3.95	100	4.5	5.4	85	6.59	290	5.06	1.19	2.69	1.33	17.66	0
60	0	72	53	159	20.9644	122	75	79	0	0	2	0	0	129	3.85	206	6.05	6.5	63	6.3	320	4.48	1.11	2.33	1.32	10.95	0
61	0	84	53	160	20.7031	145	79	78	0	0	2	1	0	130	4.03	142	5.18	6	67	4.81	350	3.93	0.82	1.7	1.7	15.45	0
62	0	88	50	150	22.2222	137	81	83	0	0	2	1	0	141	9.51	262	5.49	5.8	53	3.66	390	4.91	2.65	2.47	1.14	17.29	0
63	0	83	42.4	141	21.3269	138	69	80	0	0	2	1	1	109	3.75	145	5.94	7.1	89	6.33	271	4.86	0.75	2.41	1.56	20.47	0
64	1	80	75	170	25.9516	135	66	95	0	0	2	1	0	136	9.1	235	4.98	5.9	77	9.6	351	4.51	1.12	2.1	1.61	19.51	0
65	0	87	58.8	150	26.1333	153	64	89	0	0	2	1	0	129	6.98	301	4.74	6	64	5.14	404	3.12	0.86	1.33	1.29	14.1	0
66	0	86	60	158	24.0346	169	93	84	0	0	2	1	0	131	6.17	294	5.65	6.8	60	3.86	225	3.8	1.65	1.65	1.35	14.58	0
68	1	86	70	164	26.0262	139	79	95	1	0	2	1	0	121	6.38	156	4.93	5.6	158	9.69	402	4.15	1.19	2.01	1.34	34.29	0
69	0	76	52.1	160	20.3516	117	66	80	0	0	2	1	1	133	9.31	268	6.61	7	83	4.97	265	5.1	1.85	2.47	1.72	18.09	1
70	0	75	60.4	158.5	24.0424	139	69	87	0	0	2	0	1	140	6.02	406	14.75	8.3	60	3.47	411	4.82	2.56	2.42	1.27	11.14	1
72	1	65	70	173.5	23.2541	166	100	86	0	0	2	0	0	143	6.84	372	6.98	6.7	85	4.29	425	5.26	1.61	3.36	1.05	15.19	1
73	0	66	47	143	22.984	150	76	78	0	0	2	0	0	120	4.11	154	5.74	5.6	58	6.05	366	7.72	2.75	2.88	1.29	8.76	1
75	0	65	48	151	21.0517	117	51	74	0	0	2	0	0	126	4.99	192	4.79	5	72	6.61	379	6.66	1.11	3.33	2.09	10.53	0
76	0	70	50	154	21.0828	151	79	76.5	0	0	2	0	0	129	6.85	220	7.8	8.1	77	5.85	299	5.57	1.52	3.74	1.3	12.71	1
77	1	68	65	170	22.4913	113	84	85	0	0	2	0	0	165	9.8	238	5.75	5.9	91	6.59	313	5.59	2.5	2.96	1.21	32.85	0
78	1	76	55	160	21.4844	123	75	82	1	0	2	0	0	153	5.94	180	4.36	5.4	104	5.59	459	6.57	1.23	3.34	1.8	17.48	1
79	0	70	59	153	25.204	164	69	86.5	0	0	2	0	1	141	7.42	224	18.69	11.2	63	6.82	379	6.73	1.32	3.68	1.44	10.35	1
80	0	69	61	150	27.1111	143	73	84	0	0	2	1	0	122	4.22	243	6.09	6.3	67	4.76	376	6.2	2.23	4.11	1.08	17.09	1
82	1	66	72.4	171.5	24.6156	145	83	93	1	0	2	0	0	164	6.53	204	5.85	5.8	80	5.24	395	6.69	1.64	4.53	1.07	62.9	1
83	0	67	59.3	150.5	26.1807	144	90	88	0	0	2	0	0	130	8.94	368	5.13	6	62	5.08	223	6.52	1.19	3.78	1.39	15.87	0
84	0	72	50.9	153	21.7438	137	69	85.5	0	0	2	0	1	109	6.2	328	6.5	7	96	6.23	459	6.37	1.83	3.6	1.14	25.64	1
85	0	65	57.8	156.5	23.5993	174	88	81	0	0	2	1	1	130	6.61	312	7.09	7	59	4.33	344	4.58	1.73	2.38	1	15.89	0
86	1	70	59.1	156.5	24.1301	132	70	84	1	0	2	0	0	141	5.07	175	5.12	5.9	98	7.51	484	6.04	0.71	3.54	1.4	15.32	1
87	0	72	41.2	146.5	19.1965	172	70	71.5	0	0	2	1	1	135	7.58	300	7.54	9.1	62	6.87	231	7.53	1.51	4.19	1.85	10.47	0
88	0	65	71.3	152.5	30.6584	149	92	87	0	0	2	1	0	133	6.46	270	5.02	5.2	67	5.46	275	4.54	1.24	1.81	2.01	16.89	1
89	1	70	66	166.5	23.8076	117	74	97	0	5	2	0	0	150	6.62	214	4.38	5.5	83	4.85	362	4.44	1.45	2.43	0.94	16.04	0
91	0	68	60.4	150	26.8444	139	75	88	0	0	2	0	0	135	6.6	255	5.13	6.2	63	7.85	663	7.75	1.01	4.29	1.77	14.49	1
92	0	65	53.7	161.5	20.5887	135	92	80	0	0	2	0	0	130	5.15	208	5.33	5.8	67	4.06	245	6.98	1.58	3.57	2.02	16.12	0
94	0	73	51.2	153	21.8719	112	73	94	0	0	2	0	0	143	9.52	362	4.87	5.8	74	4.99	201	7.89	1.65	3.27	1.94	22.29	0
95	0	78	62.2	144.5	29.7889	120	72	100	0	0	2	0	0	151	5.67	335	5.44	5.4	73	4.27	396	4.94	2.41	2.38	0.98	15.17	1
96	0	65	56.78	155	23.6337	184	84	83	0	0	2	0	0	127	5.88	279	5.72	6.5	47	6.5	270	7.84	2.65	4.36	1.22	12.72	1
98	0	65	63	154	26.5643	155	96	87	0	0	2	0	0	141	5.52	192	5.27	5.4	63	5.18	299	5.14	2.09	2.72	1.1	15.6	1
99	1	68	74.2	172	25.0811	162	91	82	0	0	2	1	1	165	5.53	196	7.96	8	80	7.23	352	3.69	0.69	1.83	1.26	20.6	0
100	1	65	65.7	155.5	27.1709	157	78	93.5	0	0	2	0	0	152	5.2	145	5.95	5.3	76	4.39	227	6.35	1.82	3.73	1.12	14.46	1
101	1	66	66	169.5	22.9723	108	60	88	1	0	2	0	0	143	4.41	190	5.73	5.9	105	8.15	414	4.39	1.03	2.2	1.53	14.09	0
102	0	73	58.8	142.5	28.9566	151	67	94	0	0	2	0	0	127	7.23	229	4.81	6.1	53	4.26	319	5.74	1.43	3.2	1.22	22.1	1
103	0	75	55.3	150	24.5778	139	75	90	0	0	2	0	1	127	6.2	172	7.04	7.1	103	5.04	377	3.78	2.75	1.75	0.84	18.45	1
105	0	72	62.7	160	24.4922	133	82	80	0	0	2	0	0	147	4.66	240	4.62	5.7	46	2.85	198	3.77	1.72	1.74	1.13	16.82	0
106	0	67	43.9	149.5	19.6418	101	55	72	0	0	2	0	0	126	4.02	264	4.74	5.5	53	4.41	290	6.57	1.31	3.27	2.16	12.54	0
107	0	84	47	151	20.6131	146	89	81	0	0	2	0	1	143	7.76	293	10	7.4	64	5.87	294	4.91	2.86	1.75	1.24	17.34	0
108	0	72	68.7	160.5	26.669	143	60	89	0	0	2	0	0	110	6.23	244	5.53	5.5	58	5.36	349	6.85	1.05	4.11	1.46	16.07	1
109	1	73	51.2	163.5	19.1529	142	84	73	0	0	2	0	0	128	4.09	127	4.7	5.4	56	3.14	349	4.91	0.76	2.48	1.69	22.17	0
110	0	68	79.9	157.5	32.2096	131	68	98	0	0	2	0	0	128	6.14	287	4.6	4.5	65	5.83	220	3.71	0.68	2.07	1.15	12.19	1
111	0	66	54	151	23.6832	126	83	82	0	0	2	0	0	141	9.68	330	6.72	7.5	60	4.43	431	8.93	1.79	5.11	2	13.27	1
113	1	71	72.9	177	23.2692	128	70	90	0	0	2	0	0	147	9.79	206	4.28	5.8	88	4.31	429	4.74	1.11	2.53	1.28	14.32	0
114	0	65	61.5	154	25.9319	139	86	89	0	0	2	0	0	131	4.9	233	6.06	6.2	61	4.65	282	7.18	1.48	5.06	1.43	13.85	1
115	0	75	52.6	156.5	21.4762	99	59	78	0	0	2	0	0	124	4.03	218	5.04	5.6	53	5.79	310	5.54	1.21	3.81	1.17	8.289	0
116	1	66	72.9	171.5	24.7856	106	67	89	0	0	2	0	0	137	7.26	269	7.18	6.1	97	6.67	378	3.78	1.45	2.29	1.25	13.97	1
117	0	66	45.6	150.5	20.1322	155	75	83	0	0	2	0	0	127	6.75	171	5.01	5	67	3.06	168	6.26	1.59	3.32	2.8	16.82	0
118	1	83	69.9	170	24.1869	135	57	91	0	25	2	1	0	125	7.63	204	5.51	4.7	120	7.26	510	3.65	1.02	2.33	0.91	17	0
119	0	82	49.8	153	21.2739	130	63	81	0	0	2	1	1	150	9.41	189	6.23	6.4	89	6.18	328	3.47	1.04	1.9	1.45	14.28	0
120	1	65	48.2	160.5	18.711	106	65	63	0	0	2	0	0	149	6.75	152	5.97	6.1	80	6.74	443	5.79	0.61	3.54	1.92	14.12	0
121	0	68	55.3	155.5	22.8699	122	72	85	0	0	2	0	1	126	4.45	152	7.96	7.3	67	5.53	281	5.83	1.79	3.99	1.24	8.42	0
123	0	70	45.5	151	19.9553	154	74	83	0	0	2	0	0	141	5.49	168	6.44	6.3	59	3.1	239	4.11	1.63	2.81	1.08	21.39	0
124	0	77	46.6	152	20.1697	136	61	77	0	0	2	1	0	119	9.41	318	6.09	6	58	5.27	317	5.86	1.27	3.74	1.72	12.03	0
126	0	67	72.6	152.5	31.2174	163	86	93.5	0	0	2	1	1	139	8.21	312	10.28	9.8	70	6.84	444	6.56	1.13	4.29	1.97	15.54	1
127	0	78	51.9	150	23.0667	134	85	86	0	0	2	0	0	139	6.04	307	5.71	5.6	71	4.17	381	5.87	1.36	3.85	1.61	21.05	0
128	0	81	68	156.5	27.7639	123	80	91	0	0	2	1	0	126	6.85	229	6.82	6.4	62	5.5	280	4.04	1.1	2.33	1.44	17.37	1
129	0	84	55.2	156	22.6824	119	80	82	1	0	2	0	0	135	5.67	219	5.58	6.1	58	7.32	368	5.34	0.82	3.37	1.63	17.1	0
130	0	67	64.5	158	25.8372	133	67	90	0	0	2	0	0	134	6.33	294	5.84	5.7	56	4.6	179	4.89	1.25	3.37	1.17	10.53	1
131	1	80	65.8	166	23.8786	134	76	87	0	25	2	0	0	152	5.74	129	5.42	5.5	79	5.39	308	3.77	1.75	2.38	1.29	11.11	0
132	0	75	53.6	162	20.4237	176	84	79	0	0	2	1	0	137	7.29	184	5.71	5.4	57	5.56	239	4.57	1.09	2.49	2.08	9.58	0
133	0	68	55.9	157.5	22.5346	177	62	85	0	0	2	0	0	126	6.22	305	6.08	5.7	44	5.14	254	4.66	2.57	2.77	1.42	10.97	0
134	1	69	80.9	177	25.8227	127	85	98	0	0	2	1	0	158	8.62	162	6.97	6.2	96	3.76	534	4.34	0.93	2.7	1.42	19.95	1
135	0	67	68.7	166	24.931	156	89	85	0	0	2	0	0	138	7.09	261	5.46	5.2	61	5.54	374	4.49	1.46	2.89	1.38	8.119	1
136	0	72	61.5	155	25.5983	158	83	85	0	0	2	0	0	149	7	222	6.87	6.5	54	6.46	406	4.32	1.66	2.66	1.27	11.88	1
137	1	67	68.2	168	24.1638	133	78	88	0	0	2	1	0	152	5.85	166	6.35	5.7	90	5.59	266	3.61	0.66	2.29	1.27	17.35	0
138	1	71	83.1	165	30.5234	160	80	105	1	0	2	1	0	141	4.97	164	6.5	6.3	75	5.59	259	3.12	0.75	1.6	1.51	11.74	1
140	0	65	50.6	154	21.3358	129	73	83	0	0	2	0	0	135	4.92	259	7.14	6	52	5.09	301	5.38	1.54	3.57	1.38	8.88	1
141	0	66	56.1	156	23.0523	122	66	79	0	0	2	0	0	143	5.33	249	5.72	6.1	60	4.39	380	5.28	1.7	3.44	1.42	11.86	1
143	0	67	46.5	144	22.4248	137	75	79	0	0	2	0	0	131	7.46	394	5.55	6.1	73	4.3	234	5.61	1.34	3.72	1.5	9.82	0
145	1	64	77.6	177.5	24.63	111	73	94.5	1	0	2	1	1	142	7.31	246	7.61	5.6	85	7.49	483	8.07	2.22	5.74	1.46	10.95	0
146	0	65	59.6	147.5	27.3944	145	72	81	0	0	2	0	1	133	7.55	288	7.56	6.5	100	5.37	359	7.4	2.23	5.19	1.32	15.17	0
148	0	65	70.7	161	27.2752	152	70	88	0	0	2	0	0	127	9.37	346	6.81	6.5	60	5.02	396	5.24	2.41	3.53	1.13	9.32	1
149	1	66	60.4	153	25.802	124	81	85	0	5	2	1	0	138	6.51	117	5.34	6	132	6.78	523	5.63	2.15	3.82	1.17	17.37	0
152	0	72	50.6	155.5	20.9262	115	62	85	0	0	2	0	0	131	4.53	183	5.59	5.9	53	4.49	269	3.7	1.31	2.22	1.41	10.08	0
153	1	66	92.8	173.5	30.8283	132	78	107.5	0	0	2	1	1	156	8.72	204	8.32	6.9	62	5.16	191	3.06	1.14	1.98	0.91	15.34	1
154	0	66	55.4	159	21.9137	122	72	86.5	0	0	2	0	0	133	5.37	216	5.42	5.8	57	3.6	278	5.27	1.75	3.61	1.26	8.119	0
155	0	71	65	151.5	28.3197	136	68	101	0	0	2	1	0	136	6.21	198	4.96	5.3	65	5.69	307	5.25	2.07	3.48	1.19	20.79	1
157	0	69	55.6	158	22.2721	121	86	92	0	0	2	0	0	138	6.46	215	8.61	7.2	60	4.95	253	4.72	1.36	2.63	1.9	16.7	1
158	0	75	67.2	146.5	31.3108	145	64	95.5	0	0	2	1	0	114	6.88	288	7.3	6.5	80	5.04	350	4.53	1.59	2.79	1.09	9.13	1
160	1	75	70.6	173	23.5892	124	88	91	0	0	2	1	0	140	6.94	264	6.39	5.4	114	7.45	484	4.63	0.99	2.92	1.48	24.79	0
161	0	73	65	153	27.7671	136	67	96	0	0	2	1	1	140	6.05	287	6.95	6.7	51	6.07	252	6.13	1.24	4.16	1.67	12.79	1
162	1	74	90	182	27.1706	119	67	114	0	0	2	0	0	154	7.39	169	6.46	6.2	81	5.35	526	4.1	1.95	2.79	0.92	22.21	1
163	0	73	43.9	160	17.1484	118	74	68	0	0	2	0	0	124	7.11	253	6.34	6	50	6.35	213	4.29	1.08	2.43	1.73	7.9	0
164	1	65	97	163.5	36.2858	130	81	97	0	0	2	1	0	164	5.11	229	4.95	5.5	48	4.38	375	5.18	1.85	3.6	1.1	15.83	1
166	1	69	70.5	168.5	24.8307	153	96	87	0	0	2	1	0	137	5.68	161	5.83	5.7	74	6.51	408	6.74	1.19	4.32	2.14	13.72	0
167	1	70	53.4	155	22.2268	163	85	80	0	0	2	1	0	140	5.9	247	8.44	6.5	80	5.21	436	5.53	1.41	3.55	1.56	11.81	1
169	0	65	50.9	150.5	22.4722	122	70	82	0	0	2	0	0	127	6.39	299	5.99	6.5	47	5.63	322	4.67	2.86	3.05	1.1	9.22	0
171	0	67	46.1	152	19.9533	117	71	73	0	0	2	0	0	141	8.81	233	5.69	6.3	58	4.55	348	5.46	4.36	3.64	1.31	10.16	0
172	0	69	50.2	147.5	23.0738	112	66	79.4	0	0	2	0	1	111	5.96	151	10.48	7.2	76	5.86	299	4.96	0.77	3.34	1.44	7.79	0
174	0	65	62.4	168	22.1088	107	67	89	0	0	2	1	0	122	4.71	257	5.17	5.8	55	4.27	277	3.38	1.44	1.74	1.63	6.97	0
175	0	67	57.3	162	21.8336	155	90	82	0	0	2	0	0	144	4.17	178	5.63	6.1	61	6.57	343	5.62	0.58	3.63	1.76	10.87	0
177	1	75	66	172	22.3094	130	82	87	0	0	2	0	0	160	6.81	151	5.04	5.7	94	6.17	322	5.07	0.91	2.92	2.02	19.62	0
178	0	72	57	158	22.8329	129	82	84	0	0	2	0	0	140	5.18	270	8.96	7.1	57	5.56	277	7.31	1.04	4.88	1.77	13.3	1
180	0	75	53.9	156.5	22.007	120	60	78	0	0	2	0	0	128	7.23	335	6.48	6.4	65	4.57	253	5.14	3.54	3.19	1.39	8.74	1
181	0	67	52.1	158	20.8701	131	85	79	0	0	2	0	0	123	2.9	183	5.51	5.4	49	6.04	250	4.91	0.95	3.05	1.74	9.67	0
182	1	71	67.1	169.5	23.3552	139	93	91	1	0	2	0	0	136	7.21	264	5.2	5.7	57	4.83	321	6.61	1.19	4.62	1.49	11.22	0
184	0	72	58.1	154.5	24.3399	161	102	79.2	0	0	2	0	0	135	4.7	179	5.56	5.9	57	4.06	346	5.76	1.19	4	1.4	10.92	1
185	1	73	60.3	168.5	21.2382	125	63	83	0	0	2	0	1	162	5.71	239	7.06	7	87	8.47	420	3.27	0.89	2.05	1.13	17.93	0
186	0	69	55.4	151.5	24.1371	108	62	88	0	0	2	0	0	134	4.37	190	6.89	6.1	59	5.88	335	3.51	1.04	2.25	1.11	10.42	0
187	1	65	67.5	167.5	24.0588	134	73	87	1	0	2	0	0	138	4.23	157	5.68	6	93	5.9	319	5.31	0.89	3.45	1.52	11.66	0
188	0	75	65.3	160.5	25.3491	142	64	101	0	0	2	1	0	120	5.04	204	5.58	6.2	105	8.52	559	5	1.58	3.17	1.31	21.69	0
189	1	66	81.5	170	28.2007	150	92	94	1	0	2	1	0	167	8.51	170	5.29	5.7	82	5.26	345	5.29	1.91	3.21	1.24	13.33	1
190	0	67	55.5	158	22.232	121	64	80	0	0	2	0	1	123	4.88	176	10.5	9.6	77	8.65	299	7.71	2	4.73	1.91	15.54	1
192	1	69	68.4	166	24.8222	137	83	84	1	0	2	1	1	136	9.78	280	9.97	6.8	74	7.73	372	4.86	1.54	2.74	1.65	13.48	1
193	1	67	58.4	163.5	21.8463	140	84	80	1	0	2	0	0	137	7.45	317	4.59	5.5	76	8.67	375	5.58	1	3.68	1.25	13.37	0
194	0	66	51.5	149	23.1972	119	62	79	0	0	2	0	0	125	6.22	219	5.06	5.6	55	5.71	229	5.29	2.42	3.32	1.17	11.56	0
195	0	70	58.5	161.5	22.429	155	79	78	0	0	2	0	0	136	4.66	243	4.96	5.9	57	4.29	283	4.55	0.78	2.62	1.51	12.57	1
196	0	70	61.5	155.5	25.434	134	83	70	0	0	2	1	0	134	4.06	236	5.55	6.2	75	5.93	320	6.92	1.6	4.44	1.54	12.53	1
197	0	86	38.9	153.5	16.5095	134	72	96	0	0	2	0	0	131	3.46	180	5.86	5.9	57	6.48	321	3.61	0.66	1.94	1.36	19.14	0
198	0	74	64.4	155	26.8054	129	68	93	0	0	2	0	0	137	5.01	175	5.38	6	68	6.52	283	3.82	2.81	2.07	1.01	14.08	1
199	1	77	77.2	180	23.8272	143	89	89	0	0	2	0	0	155	5.87	181	5.23	5.5	86	7.33	368	5.62	1.39	3.52	1.4	15.31	0
200	1	71	62	171.5	21.0797	114	66	88	1	5	2	0	0	165	5.37	140	4.86	5.4	80	6.7	319	6.01	1.38	3.87	1.31	13.74	0
201	0	79	48	151.5	20.913	133	85	74	0	0	2	1	0	121	5.43	259	5.65	5.7	48	6.44	274	5.95	1.28	3.52	1.73	15.74	0
202	0	79	49.3	151	21.6219	145	73	81	0	0	2	1	0	136	7.36	280	6.75	6.6	59	5.84	331	7.54	2.22	4.74	1.86	13.66	1
203	1	70	79	175	25.7959	136	81	98	0	0	2	1	0	183	7.75	201	5.89	5.8	86	5.95	403	7.17	1.39	4.76	1.42	14.88	1
204	0	65	51.3	154.5	21.4912	108	61	85	0	0	2	0	0	139	5.56	196	7.19	6.6	76	5.96	362	7.72	0.9	4.91	1.89	9.89	1
205	0	66	67.9	153	29.0059	136	66	95	0	0	2	0	0	130	6.12	160	6.82	6	48	7.04	318	5.03	0.58	2.83	1.94	13.98	1
206	0	66	43.9	154.5	18.3911	115	66	74	0	0	2	0	0	128	5.16	220	5.22	5.2	51	4.96	278	6.24	1.2	3.82	1.84	12.42	0
207	0	83	53.9	150.5	23.7966	170	61	83	0	0	2	1	0	131	9.91	247	5.28	9.91	61	4.68	324	5.18	1.55	2.84	1.78	13.19	0
208	0	65	58.8	158	23.5539	130	82	81	0	0	2	0	0	131	5.21	218	5.69	5.8	56	7.92	282	6.4	0.72	3.79	2.02	10.9	1
209	0	75	60.3	157.5	24.3084	122	62	90	0	0	2	0	1	155	5.23	142	9.43	7.1	54	7.53	276	3.86	0.55	1.77	1.91	15.14	0
210	0	78	48.7	149.5	21.7895	135	61	80	0	0	2	1	0	122	4.67	170	5.76	5.7	84	6.57	341	5.7	4.92	3.49	1.15	12.09	1
211	1	66	69	169	24.1588	167	97	88	1	0	2	0	0	152	5.27	317	6.02	6.9	88	5.81	227	5.17	3.7	3.11	1.17	12.95	1
212	0	68	72.7	158.5	28.9385	128	68	96	0	0	2	1	0	130	4.92	267	5.88	6	47	4.13	417	5.45	1.71	3.31	1.35	10.4	1
213	0	68	50.3	164	18.7017	148	92	72	0	0	2	0	0	139	3.67	138	5.8	5.5	72	5.7	337	7.51	0.65	3.89	3.26	11	0
214	0	70	56.8	156.5	23.191	144	91	80	0	0	2	1	1	133	6.38	168	5.51	6.5	81	7.32	316	4.34	1.04	2.22	1.75	13.84	0
215	0	73	51	154	21.5045	160	78	78	0	0	2	1	0	127	6.51	246	4.65	5.6	82	5.22	331	6.53	1.44	3.92	1.67	13.86	0
216	1	72	71	172	23.9995	149	78	89	1	15	2	0	1	158	7.25	258	7.06	6.6	91	7.97	345	5.35	2.27	3.36	1.22	15.12	0
217	1	67	64	162.5	24.2367	132	83	87	0	5	2	0	0	148	7.52	281	4.8	5.7	84	4.59	404	6.96	1.21	4.54	1.41	17.17	0
218	0	80	60.3	151	26.4462	164	76	96	0	0	2	1	0	119	4.21	295	5.39	6	65	5.8	455	6.23	2.15	3.76	1.56	18.47	1
220	1	75	48.3	153	20.6331	151	75	75.3	0	0	2	1	1	139	5.9	156	5.9	6	96	4.2	363	2.46	0.95	1.2	1.15	22.19	0
221	0	76	56.1	156.5	22.9052	120	77	84	0	0	2	1	0	140	5.68	226	5.47	5.9	61	7.18	434	8.13	6.02	4.85	1.59	11.56	1
222	1	81	77	164	28.6288	149	78	95	0	0	2	0	0	148	4.86	190	7.06	6.9	81	6.84	329	5.77	2.09	3.77	1.12	11.63	1
223	0	80	52.5	149	23.6476	138	73	83	0	0	2	0	0	120	6.99	375	4.79	6	61	4.97	295	6.32	1.09	4.06	1.54	15.03	0
225	1	73	56.4	163.5	21.0981	153	71	81	1	0	2	0	1	149	6.96	221	5.32	7.5	108	7	464	7.52	1.12	4.9	1.35	19.14	0
227	1	76	79.2	176	25.5682	125	89	96	1	0	1	0	0	146	6.07	200	7.03	6.1	159	10.72	419	6.05	3.22	3.92	1.19	20.75	1
228	1	72	54.7	162	20.8429	133	67	83	1	0	1	1	0	144	4.78	149	5.5	5.6	190	10.29	352	5.1	0.9	2.83	1.85	31.92	0
229	1	82	69.7	172.5	23.4237	135	68	93	1	0	1	1	0	143	13.21	632	5.67	5.4	147	11.9	463	4.16	1.99	2.76	0.91	39.31	1
230	1	66	73	160	28.5156	161	85	102	0	0	1	1	1	150	6.86	167	8.85	7.9	71	7.82	289	5.54	0.71	3.45	1.79	12.78	1
231	0	74	57.5	153.5	24.4034	141	54	86	0	0	1	0	0	116	7.22	309	6.17	5.9	115	7.82	445	6.51	1.28	4.23	1.66	18.05	0
232	0	65	63.8	152.5	27.4335	141	91	103	0	0	1	1	1	117	6.61	293	7.45	6.9	68	6.42	295	5	1.45	2.85	1.72	17.11	1
234	1	77	63.4	165	23.2874	149	74	98	0	0	1	1	1	132	3.37	195	5.57	6.2	564	10.53	255	2.21	1.13	1.09	0.94	18.34	1
235	1	72	65.3	167.5	23.2747	140	78	89	0	0	1	1	0	142	6.52	211	5.24	5.4	125	8.88	369	3.56	2.07	1.63	1.75	20.89	1
236	1	79	59.1	162	22.5194	147	83	83	0	0	1	1	1	121	10.99	288	7.57	7.3	80	6.91	304	4.1	1.23	2.52	1.27	14.06	1
237	0	64	59	156.5	24.0893	165	85	74	0	0	1	0	1	137	10	150	10.4	6.5	59	5.34	292	4.68	0.81	2.65	1.77	11.07	1
238	0	67	68.5	166.5	24.7094	130	83	83	0	0	1	1	1	151	7.51	305	7.82	6.4	66	6.63	202	4.65	1.9	3.05	1.17	9.26	1
239	0	69	75	156	30.8185	131	72	99	0	0	1	1	0	144	8.11	238	6.76	7.5	75	4.35	457	4.5	1.85	2	1.11	15.65	1
240	0	70	53	151	23.2446	129	83	86	0	0	1	0	0	137	6.1	162	5.49	5.4	58	5.89	293	4.17	1.1	2.73	0.96	NA	0
241	0	74	51.3	153	21.9146	131	87	77	0	0	1	1	0	135	6.25	87	6.38	6	85	6.41	420	3.78	0.87	2.51	1.15	14.69	0
242	1	74	70	173	23.3887	134	79	93	0	0	1	0	0	141	6.61	457	5.46	6.1	85	5.81	324	4.77	0.77	3.12	1.33	33.67	1
243	0	74	61.7	160	24.1016	153	75	93.5	0	0	1	1	0	148	3.84	152	5.02	5.6	52	5.3	218	5.97	1.98	3.41	1.81	15.48	1
244	1	67	69	162	26.2917	150	70	89	0	0	1	1	0	139	7.5	254	7.34	4.9	101	4.8	311	3.94	1.27	2.52	1.17	13.32	1
245	0	66	84.9	159	33.5825	140	82	113	0	0	1	0	0	135	6.24	256	5.08	6	69	5.87	466	5.25	3.42	3.01	1.04	12.38	1
246	0	79	65	164	24.1672	129	55	83	0	0	1	1	0	125	5.52	220	5.6	5.9	91	5.17	429	4.15	1.73	2.11	1.31	10.37	1
247	1	87	96	150.5	42.3836	149	63	117	0	0	1	1	0	137	9.04	187	5.93	6.4	110	7.11	386	3.85	2.49	2.23	0.9	18.1	1
249	0	76	58.2	152	25.1904	138	68	85.5	0	0	1	1	1	135	7.26	250	8.66	8.2	55	5.99	349	5.81	2.38	3.65	1.19	16	1
250	0	91	45	150	20	117	80	80	0	0	1	0	0	150	5.15	214	6.16	5.7	61	4.73	371	5.4	1.52	3.39	1.18	18.3	1
251	0	77	74.9	150	33.2889	153	83	105	0	0	1	1	0	142	10.69	252	6.98	6.2	57	6.52	407	6.43	1.93	4.34	1.43	17.27	1
252	0	70	63	157	25.5588	130	82	92	0	0	1	0	0	131	4.38	200	9.33	7.2	63	3.73	340	3.87	1.58	2.38	1.06	8.36	0
255	0	72	63.1	154.5	26.4346	131	62	92.5	0	0	1	0	0	120	8.19	253	6.15	6.5	65	3.98	483	4.98	2.32	3.13	1.21	21	1
257	1	69	62.2	162	23.7007	140	85	95	0	0	1	0	0	147	5.5	109	8.22	5.8	108	7.98	559	4.54	1.27	2.78	1.35	19.76	1
258	1	66	58.9	168	20.8688	135	66	82.5	1	0	1	1	1	150	9.59	268	4.8	7.6	76	3.85	429	3.45	1.37	2.03	1.04	17.57	1
259	1	77	44.8	159.5	17.6099	150	84	78.5	0	0	1	1	0	122	3.71	245	5.26	4.9	98	6.14	407	4.9	1	2.75	1.89	24.56	0
260	0	66	52.7	155.5	21.7946	149	79	70	0	0	1	1	0	134	6.54	282	5.11	5.4	59	5.63	176	6.89	1.63	3.93	2.23	11.69	0
263	0	79	61.8	165.5	22.5628	142	87	92	0	0	1	0	0	142	7.37	342	8.85	7.3	91	6.32	461	6.49	4.62	3.27	1.22	14.79	1
266	1	65	62.5	165	22.9568	174	110	93	0	0	1	0	0	143	7.84	146	5.05	5.9	95	6.97	362	5.43	1.38	3.45	1.29	17.25	0
267	1	80	56	164	20.8209	119	70	78	0	0	1	0	0	141	5.48	135	5.25	5.7	70	4.87	301	3.15	1.45	1.89	1.03	9.51	0
268	0	71	55.1	157	22.3538	166	90	90	0	0	1	0	0	129	5.64	221	5.68	5.7	67	5.44	344	9.51	7.24	3.01	1.11	13.42	0
269	1	84	50.1	154.5	20.9885	162	60	86	0	0	1	1	0	109	5.74	120	6.16	6.4	121	9.43	454	2.49	0.7	1.18	1.17	19.2	0
270	1	69	87.4	175.1	28.5062	125	84	95	0	0	1	0	0	156	4.42	254	5.1	5.8	87	6.89	349	5.88	0.86	3.88	1.43	13.48	1
271	0	66	48.5	147	22.4444	169	72	76	0	0	1	1	0	126	4.16	132	6.16	5.7	58	6.09	305	3.12	0.93	1.78	1.16	6.16	0
272	1	69	80.5	174.5	26.4366	153	98	101	1	0	1	0	0	145	7.31	254	6.85	6.5	67	5.12	301	4.24	1.47	2.66	1.05	14.98	1
273	1	74	73.6	162	28.0445	129	80	90	0	0	1	0	0	143	3.5	159	7.01	5.8	101	4.7	485	4.43	1.14	2.8	1.25	10.48	1
274	0	76	66.2	159.5	26.0218	167	76	87	0	0	1	1	0	119	6.47	196	6.12	6	65	5.19	310	4.48	1.23	2.7	1.52	14.88	1
275	0	65	49.2	148.5	22.3106	105	60	75	0	0	1	0	0	154	8.18	124	8.22	7.5	54	5.31	225	3.88	1	2.12	1.37	10	0
276	0	71	57	155	23.7253	143	77	84	0	0	1	0	0	135	5.84	264	5.86	6.4	62	5.53	314	3.83	1.52	2.24	1.36	9.199	1
277	0	71	54.7	153	23.3671	139	79	77	0	0	1	0	1	139	5.29	255	7.54	6.1	67	6.35	524	8.34	3.59	4.97	1.31	14.11	1
278	0	75	62.4	156	25.641	156	96	87	0	0	1	1	0	126	5.6	241	6.74	6.2	59	4.64	337	4.6	1.28	2.6	1.9	8.11	0
279	0	72	57.1	153.5	24.2337	177	90	74	0	0	1	1	1	125	5.64	218	7.61	6.9	60	3.79	276	3.58	2.75	1.68	1.29	55.7	0
280	0	74	58	153.5	24.6156	125	61	80	0	0	1	1	0	154	4.16	185	4.88	5.8	66	4.95	407	6.74	1.5	4.61	1.2	18.18	1
281	1	65	79	161	30.4772	152	87	106	0	0	1	0	0	153	7.52	253	6.43	5.7	72	4.83	293	4.2	1.23	2.71	1.18	47.18	0
282	0	64	61.3	154.5	25.6805	151	79	88	0	0	1	0	0	104	6.14	265	5.82	5.7	48	7.2	172	5.21	0.8	2.89	1.95	8.08	0
283	0	77	42	147	19.4363	110	50	71	0	0	1	0	0	134	4.87	269	4.22	5.8	48	6.39	271	6.22	0.62	4	1.9	8.58	0
284	1	69	74.8	174	24.706	154	81	97	0	0	1	1	0	157	9.18	230	10.81	10	67	4.19	511	8.05	5.73	4.67	1.57	15.79	1
285	1	65	70.2	169	24.579	134	81	89	1	0	1	0	0	156	10.24	452	8.37	8.6	62	5.86	274	4.98	1.65	3.27	1.04	17.91	1
286	0	75	50	157	20.2848	164	87	77	0	0	1	1	1	133	4.5	205	5.38	7.1	67	4.07	345	3.55	0.77	1.88	1.59	8.73	0
287	0	67	38.8	153	16.5748	99	64	60	0	0	1	0	0	114	5.72	220	5.06	5.7	46	6.95	172	4.31	0.89	2.28	1.82	13.7	0
288	1	75	61	159	24.1288	143	79	83	1	25	1	1	1	154	5.88	138	5.94	6.6	65	3.41	325	3.41	1.06	1.91	1.22	8.949	0
289	1	65	64	159.5	25.157	122	78	85	0	0	1	0	0	162	5.42	230	5.85	6	83	5.22	333	6.75	1.05	4.65	1.3	11.78	1
290	0	67	50	150	22.2222	113	70	78	0	0	1	1	0	123	3.83	199	5.78	6	70	6.41	305	6.85	1.08	4.37	1.95	7.85	0
291	1	72	79	171	27.0169	142	87	92	0	0	1	1	0	163	7.92	182	6.46	5.7	91	5.05	426	3.69	2.16	2.42	0.88	16	1
292	0	74	38.9	152	16.8369	119	64	81	0	0	1	1	0	124	5.18	197	5.67	5.9	60	5.83	206	5.38	1.6	2.94	1.69	15.4	0
293	0	70	47	152	20.3428	132	61	69	0	0	1	0	1	113	8.18	259	9.29	7.5	65	7.34	340	3.37	0.62	1.78	1.45	8.69	0
294	0	69	59.4	151	26.0515	132	76	88	0	0	1	0	0	136	5.79	286	5.15	6.1	67	4.57	445	6.17	1.72	3.52	1.98	14.76	0
297	1	72	78.5	174	25.9281	137	77	89	0	0	1	0	0	144	5.05	210	5.24	5.8	83	5.63	249	3.68	0.8	2.19	1.33	15.9	1
298	1	83	60	167	21.5139	125	66	66	0	0	1	1	0	126	5.98	235	5.45	6.1	105.8	5.9	375	3.21	1.12	1.52	1.51	NA	0
300	0	72	59	149	26.5754	142	65	79	0	0	1	0	0	127	5.85	224	6.15	5.7	71	6.9	294	4.96	1.71	3.16	1.32	10.35	0
302	1	78	55.6	163.5	20.7988	102	66	79	0	0	1	0	0	153	5.42	182	6.04	5.9	83	8.61	310	3.23	1.98	1.62	1.43	19.35	1
303	1	76	56.9	163	21.4159	176	75	81	0	0	1	1	1	125	4.28	178	6.89	6.4	86	5.3	353	4.44	0.94	2.32	1.89	12.13	0
306	0	72	49.5	160.5	19.2157	120	73	94	0	0	1	1	0	135	4.2	194	6.24	5.5	59	5.56	278	5.58	0.63	3.88	1.8	8.96	0
307	0	81	52.6	156	21.6141	140	69	85	0	0	1	1	0	121	6.8	214	5.7	5.4	61	4.18	324	4.65	1.01	2.65	1.83	15.32	0
308	0	73	59.3	164	22.0479	127	81	88	0	0	1	0	1	151	7.49	283	13	11.3	64	5.05	377	7.56	1.13	5.14	1.72	15.94	1
309	1	65	70	176	22.5981	105	67	92	0	5	1	0	1	145	5.55	106	8.49	7.2	92	6.49	511	4.39	1.41	2.7	1.34	21.06	1
310	0	77	59.6	161	22.9929	129	61	85	0	0	1	1	1	132	8.73	268	6.6	7.5	77	5.69	310	3.62	1.25	2.23	1.31	11.52	0
311	0	69	54.9	152	23.7621	141	77	75.7	0	0	1	0	0	132	5.92	112	4.79	5.9	63	4.39	313	5.49	1.05	2.95	2.02	15.44	0
312	1	67	72.7	172	24.5741	132	85	87	0	0	1	1	0	150	5.93	224	5.48	5.9	69	6.16	419	5.03	1.79	2.86	1.27	12.84	1
313	1	65	74.4	166.5	26.8376	143	80	92.5	0	0	1	0	0	160	5.75	205	6.4	6.2	102	7.19	525	5.91	1.38	4.23	1.1	16.47	0
315	1	72	69.3	165	25.4545	141	80	91.5	0	0	1	0	0	146	6.73	231	6.02	5.8	102	7.13	443	5.7	1.58	3.78	1.15	9.21	1
316	1	66	56.4	169	19.7472	119	81	76	0	0	1	0	0	137	5.51	192	5.67	6	95	7.84	382	6.49	0.73	4	1.84	19.1	0
317	1	67	51.5	167	18.4661	123	80	73	0	0	1	1	0	131	6.09	175	5.15	5.5	79	6.53	386	3.35	1.48	1.71	1.24	18.76	0
318	1	77	49.7	160.5	19.2933	153	75	78	1	0	1	0	0	128	5.14	182	5.64	6	86	5.87	383	4.38	1.35	2.92	0.95	16.8	0
319	0	88	62.8	145.5	29.6643	150	60	99	0	0	1	1	0	92	6.16	250	6.49	5.7	94	8.95	494	3.54	0.96	1.78	1.6	13.96	1
322	0	68	53	160	20.7031	102	61	69	0	0	1	0	0	134	6.23	228	4.95	5.4	85	8.33	295	5.52	0.96	3.46	1.63	14.73	0
324	0	75	47.3	153	20.2059	112	59	69	0	0	1	0	0	126	4.34	314	5.11	5.1	63	4.7	261	4.44	0.74	2.88	1.44	9.41	0
326	1	65	63.8	160.8	24.6745	129	87	86	0	0	1	1	0	143	6.83	213	6.95	6.5	93	7.95	486	5.78	1.42	3.85	1.12	18.27	1
327	0	69	60	159	23.7332	117	67	85	0	0	1	0	0	121	4.94	233	4.82	5.7	68	5.9	350	4.02	1.92	2.5	1.24	16.45	0
328	0	68	65.4	156	26.8738	130	87	84	0	0	1	0	0	132	4.21	211	6.3	5.6	68	6.3	244	6.26	2.28	4.3	1.555	10.63	0
329	1	75	63	164	23.4236	112	62	93	0	0	1	0	0	137	20.98	113	5.2	6.2	80	5.5	359	4.5	1.57	3.28	0.81	17.62	0
330	1	76	78	175	25.4694	151	83	100	0	0	1	1	0	143	5.83	173	6	6.5	92	6.61	389	4.88	1.43	2.98	1.5	9.619	1
332	0	69	75	143.5	36.4215	105	62	102.5	0	0	1	1	0	133	6.59	366	6.13	6.5	42	3.35	302	4.23	1.1	2.46	1.7	8.99	1
333	0	68	57.9	148.5	26.2558	149	90	85.8	0	0	1	0	1	146	4.81	298	8.66	7.6	56	5	327	6.89	1.83	4.11	1.95	10.95	1
334	0	68	60	160	23.4375	125	69	83	0	0	1	0	0	138	4.84	194	5.36	5.7	69	5.21	288	5.33	0.83	3.44	1.6	NA	1
335	1	65	62.9	170.5	21.6372	109	74	77	0	0	1	0	0	104	4.02	199	5.61	5.5	85	3.3	308	4.13	1.13	2.41	1.25	65.36	1
337	0	70	51	154	21.5045	92	56	73.5	0	0	1	0	0	121	4.58	251	5.3	5.8	50	4.06	355	5.34	0.94	3.37	1.54	8.56	0
338	1	91	45.2	144	21.7978	140	65	85	0	0	1	1	0	121	4.49	197	4.87	6.1	105	7.7	287	3.68	0.73	1.38	1	15.25	0
340	1	73	61.5	164	22.8659	155	87	89	0	0	1	1	0	133	4.97	302	5.58	6.2	115	5.74	559	3.41	1.61	1.81	1.06	25.6	1
341	0	75	56	157	22.719	128	73	78	0	0	1	0	0	137	6.1	253	4.94	5.5	79	5.84	285	6.63	1.89	4.64	1.16	15.35	1
342	0	76	48.7	157	19.7574	105	62	80	0	0	1	0	0	107	6.54	300	4.94	5.8	84	7.19	418	4.94	1.19	2.47	1.63	17.98	0
343	0	66	60	151	26.3146	143	70	88	0	0	1	1	0	136	4.88	233	5.23	5.9	57	5.42	277	4.77	1.46	2.92	1.37	16.42	1
344	0	77	48	152	20.7756	158	80	75	0	0	1	1	0	137	5.73	313	6.7	6.6	62	4.71	375	6.7	2.78	4.49	1.46	10.02	0
345	0	70	53	150	23.5556	113	72	83	0	0	1	0	0	141	5.75	367	5.2	5.8	58	3.31	363	5.36	1.18	3.65	1.16	10.19	1
346	1	78	78	177	24.8971	130	81	90	1	0	1	1	0	133	3.85	198	5.73	6	78	5.27	483	5.17	0.98	3.51	0.98	16.6	1
348	0	65	56	161	21.6041	133	80	80	0	0	1	0	1	126	6.06	232	5.81	7.3	67	5.6	326	5.51	1.6	3.53	1.65	10.07	0
349	0	70	43.2	147	19.9917	161	73	74	0	0	1	1	0	135	5.47	205	5	5.8	65	5.7	309	5.82	0.87	3.8	2.12	6.1	0
351	0	72	46.6	157.5	18.7856	142	81	68	0	0	1	0	0	136	5.13	224	5.2	5.6	70	4.46	257	7.1	1.8	4.61	1.61	11.62	0
352	0	65	64	155	26.6389	116	70	83	0	0	1	0	0	132	4.32	232	5.71	5.6	61	5.53	225	6.12	0.77	3.77	1.86	11.24	0
353	1	67	63.3	167	22.6971	96	60	85.5	1	0	1	0	0	125	4.12	177	4.67	5.7	74	5.24	281	6.36	1.74	3.83	1.4	8	0
354	0	83	47.5	159.5	18.6712	134	68	70	0	0	1	1	0	146	5.23	202	5.76	6.2	58	4.7	333	4.67	2.62	2.85	1.16	8.19	0
356	0	65	60	155	24.974	114	79	79	0	0	1	1	0	136	5.16	227	5.55	5.8	48	4.12	199	5.78	0.7	3.48	1.89	8.42	0
357	0	73	55	144	26.5239	126	74	87	0	0	1	0	0	131	3.94	223	5.31	6	54	4.66	203	4.53	0.83	2.59	1.69	8.75	1
358	0	69	61.4	160	23.9844	137	64	84	0	0	1	1	1	114	5.53	218	6.61	6.4	79	6.04	453	4.6	2.8	2.62	0.92	17.79	1
359	0	67	64	157	25.9645	126	74	86	0	0	1	0	0	133	6.8	241	5.74	6.1	67	6.95	367	6.92	0.83	4.35	2.26	9.48	0
360	0	66	58	147.5	26.659	117	70	89	0	0	1	0	0	142	6.25	330	5.05	5.6	62	5.2	302	5.69	1.72	3.37	1.28	16.14	1
361	0	71	59	157	23.9361	142	82	86	0	0	1	0	1	125	5.98	339	6.32	7	58	5.33	370	4.96	1.95	3.35	1.12	18.11	1
362	1	68	52	154	21.9261	119	60	80	0	25	1	0	0	123	7.46	275	4.93	6.1	55	3.23	446	4.11	0.64	2.62	1.35	16.55	0
363	0	79	44.7	155	18.6056	200	78	73	0	0	1	1	0	120	5.65	253	6.19	6.1	60	3.79	298	6.87	1.16	4.81	1.36	12.36	0
364	0	68	50.8	163	19.12	127	71	65	0	0	1	1	0	135	5.33	232	5.5	5.9	57	4.9	259	3.86	1.54	2.13	1.53	8.6	0
365	0	76	49	154	20.6612	129	78	82	0	0	1	0	0	121	4.97	254	5.39	5.5	62	5.15	234	4.77	0.92	2.37	2.04	12.86	0
367	0	68	40	151	17.5431	126	53	72	0	0	1	1	0	131	6.7	207	4.89	5.7	53	5.02	321	5.08	0.97	3.28	1.38	9.18	0
368	0	72	58	150	25.7778	137	72	89	0	0	1	1	0	119	6.13	243	6.83	5.7	52	4.62	452	5.52	2.07	3.64	1.24	9.6	1
369	0	67	60.2	162.5	22.7976	153	86	86	0	0	1	1	0	135	6.85	286	8.36	8.3	72	7.06	314	7.39	2.1	4.06	2.37	11.93	1
371	0	69	66.4	157	26.9382	135	75	100	0	0	1	0	0	136	5.67	270	5.06	5.5	59	3.36	281	5.62	2.31	3.44	1.4	13.77	1
373	0	66	48	151	21.0517	121	72	73	0	0	1	1	0	140	6.41	327	6.18	5.5	56	4.36	245	4.58	0.81	2.36	2.05	8.73	0
374	0	78	54	145	25.6837	142	61	83	0	0	1	1	1	128	6.51	185	8.08	6.9	58	4.96	407	4.79	2.11	3.21	1.13	9.42	1
375	0	67	59.4	161	22.9158	133	61	81	0	0	1	0	1	136	4.74	241	7.2	6.97	42.29	6.43	367.71	5.52	1.67	2.92	1.18	16	1
376	0	68	54.2	162	20.6523	125	62	85	0	0	1	0	0	117	10.24	309	4.12	6	79	6.02	367	5.84	2.49	3.04	1.22	9.63	1
377	0	71	62.5	149	28.1519	127	85	104	0	0	1	1	1	144	5.65	202	7.49	6.4	58	3.64	334	3.64	2.15	1.68	1.17	19.47	0
378	0	67	57.7	155.5	23.8624	113	69	81.5	1	0	1	0	0	141	5.09	272	6.08	6.3	40	5.27	288	6.21	0.94	3.9	1.88	8.47	0
379	1	71	60.4	175	19.7224	159	98	76	0	0	1	0	0	156	8.82	261	7.09	5.6	87	5.64	347	5.19	1.08	3.32	1.59	17.12	0
380	0	66	60	150	26.6667	149	84	83	0	0	1	1	0	109	6.46	235	5.44	6.5	47	3.56	149	4.24	0.79	2.8	1.38	9.6	0
381	1	71	60	154	25.2994	131	88	90	0	0	1	1	0	158	7.65	211	5.93	6.5	70	4.51	298	4.2	0.7	2.71	1.17	10.06	0
382	0	64	60	162	22.8624	115	70	84	0	0	1	0	0	152	5.45	228	5.52	5.7	70	3.41	215	4.93	1.99	3.28	1.15	11.27	0
385	0	67	57	162	21.7193	147	79	80	0	0	1	1	1	141	9.59	352	9.98	9.4	60	4.94	395	7.34	2.15	5.11	1.37	13.3	1
386	1	65	66	168	23.3844	110	74	81	0	0	1	0	0	132	5.22	189	6.1	6.1	87	4.54	418	6.15	1.48	4.66	1.48	13.69	0
387	1	64	76	173	25.3934	118	76	89	0	0	1	0	1	159	5.21	245	11.46	9.8	81	6.94	544	5.5	4.85	3.98	0.96	13.16	1
389	1	72	64	166	23.2254	115	56	87	0	0	1	0	1	133	4.72	234	12.37	10	73	7.64	304	5.1	1.07	3.94	1.38	19.82	1
390	0	67	65	155	27.0552	147	78	89	0	0	1	0	1	122	6.78	208	7.49	7.9	58	5.8	226	3.67	0.62	2.18	1.39	6.94	0
391	1	76	67	164	24.9108	133	92	91	0	0	1	1	0	161	6.87	203	6.17	5.7	74	6.56	329	5.11	1.2	3.5	1.35	12.22	1
392	0	67	60	150	26.6667	113	65	89	0	0	1	0	0	115	4.8	109	5.42	6.1	63	5.99	351	6.17	1.41	4.18	1.48	8.619	1
393	0	65	55	156	22.6003	122	75	82	0	0	1	0	0	122	4.62	313	5.81	5.6	52	2.63	345	5.52	2.27	3.38	1.15	8.3	0
394	0	66	60	157	24.3418	149	62	82	0	0	1	1	1	137	6.31	223	7.7	7.52	74	6.4	194	4.17	1.2	2.88	1.41	10.63	1
396	1	66	54	159	21.3599	101	73	76	0	0	1	0	0	156	4.02	202	6.55	6.1	80	4.3	237	4.37	1.07	2.94	1.08	10.84	0
397	1	64	56	163	21.0772	118	85	75	0	0	1	0	0	151	5.03	197	5.47	5.7	95	6.51	420	5.16	0.71	3.38	1.44	16.39	0
398	0	77	52.5	150	23.3333	144	77	90	0	0	1	0	0	130	6.3	249	5.95	6.3	56	6.07	323	4.56	1.68	2.7	1.34	9.94	1
399	0	65	61.7	161	23.8031	152	79	87	0	0	1	1	0	131	4.5	125	7.65	6.5	61	6.79	379	3.75	1.15	2	1.61	17.64	1
400	0	66	61.9	169.5	21.5452	112	69	80	0	0	1	0	0	141	5.03	202	6.21	5.7	56	5.32	260	3.79	0.9	2.17	1.21	12.04	0
401	0	64	68.4	158.5	27.2269	116	64	91	0	0	1	0	0	148	7.09	298	6.12	5.7	62	9	331	6.38	1.75	4.39	0.99	15.38	1
402	1	72	66.4	164.5	24.5378	129	76	88	1	0	1	1	1	159	7.28	211	9.75	8.2	70	4.82	347	5	2.23	3.36	0.87	25.25	1
403	0	65	49.9	146	23.4096	143	76	80	0	0	1	0	1	122	6.4	212	9.78	8.9	65	6.4	267	7.11	2.11	4.63	1.37	15.45	1
404	1	67	52.6	152.5	22.6176	127	69	80	0	0	1	0	0	151	5	206	6.42	6.1	71	5.71	347	7.19	1.25	5.02	1.22	16.98	1
405	0	65	58.6	146	27.4911	142	81	83.5	0	0	1	1	0	133	6.35	184	6.78	5.8	72	5.79	284	6.61	1.78	4.28	1.35	20.47	1
406	0	65	50	155	20.8117	121	75	81	0	0	1	0	0	130	3.56	261	5.63	6.1	54	5.06	234	6.68	1.57	4.26	1.63	10.31	0
407	1	72	68.4	163	25.7443	158	92	92	0	0	1	1	0	148	4.81	221	6.32	5.7	77	4.68	319	6.22	2.14	4.02	1.17	19.28	1
408	0	74	52.7	152	22.8099	104	58	88	0	0	1	0	1	146	6.34	243	11.83	8.3	53	3.43	381	3.85	1.58	2.44	0.99	19.22	1
410	0	64	51.7	156	21.2442	106	67	77	0	0	1	0	0	130	3.65	251	5.67	6.3	50	7.02	400	5.73	0.88	3.56	1.65	8.97	1
411	0	70	48.3	160.5	18.7498	109	63	72	0	0	1	0	0	135	7.68	211	5.89	5.9	79	7.61	299	5.66	1.27	3.52	1.62	15.63	0
412	0	84	35.5	144	17.12	156	75	71	0	0	1	0	0	122	4.69	271	5.39	6.5	61	3.09	224	4.37	1.73	2.81	1.05	11.14	0
413	0	66	52.1	153.5	22.1116	119	70	73.5	0	0	1	1	1	135	6.14	245	6.82	5.8	57	4.9	314	3.38	0.65	1.83	1.34	16.43	0
414	1	69	64.5	170.5	22.1876	153	85	87	0	0	1	1	0	133	7.86	274	5.63	6.4	139	10.12	538	5.29	1.64	3.53	0.91	21.88	1
415	1	65	71.6	161	27.6224	146	89	94	0	0	1	1	0	146	7.17	282	5.29	5.7	94	6.02	454	4.52	0.77	3.16	0.86	26.25	1
416	0	72	62	148.5	28.115	146	99	90	0	0	1	0	0	140	5.6	279	6.69	6.5	46	4.55	298	4.45	1.3	2.84	1.15	13.33	1
418	1	77	65.7	165	24.1322	147	81	90	0	0	1	1	0	136	7.26	185	5.23	6.6	98	6.76	536	3.66	0.85	2.3	0.95	19.42	0
419	1	73	68.4	174	22.5922	116	61	91	1	0	1	0	1	143	8.17	227	6.4	7	68	5.17	391	2.25	1.91	1.23	0.67	8.369	1
420	1	67	70.2	170	24.2907	128	78	86	1	0	1	1	0	145	7.22	342	5.86	6.3	70	4.18	357	4.23	0.6	2.63	1.19	35.93	1
421	0	66	56	150.5	24.7238	132	66	81	0	0	1	0	0	132	5.11	290	5.52	5.7	50	5.95	246	6.28	2.17	4.3	1.16	9.89	1
422	1	70	61.5	159.5	24.1743	174	80	85	0	0	1	1	1	150	6.03	214	12.09	8.6	67	6.64	286	6.45	0.91	4.33	1.65	14.65	1
423	0	65	57.8	151.5	25.1827	141	82	84	0	0	1	0	0	128	5.17	252	5.6	5.9	76	5.51	332	5.55	0.67	3.52	1.74	14.14	1
424	0	69	57.8	159	22.863	133	68	88	0	0	1	1	0	139	4.56	241	5.77	4.9	77	4.94	298	4.14	0.81	2.39	1.39	8.51	1
425	0	69	60.1	143.5	29.1857	120	66	90	0	0	1	0	0	130	5.08	176	5.23	5.8	59	5.3	321	5.97	2.02	3.93	1.05	12.94	1
426	0	68	55.5	159	21.9532	146	75	82	0	0	1	0	0	129	4.33	214	5.34	4.9	73	6.83	248	4.92	0.56	2.84	1.93	14.38	0
428	0	82	60	149	27.0258	126	66	87.5	0	0	1	0	0	144	6.99	213	5.44	5.8	67	7.87	347	6.44	2.43	4.4	1.09	15.94	1
429	0	75	62.8	153.5	26.6528	154	82	87.5	0	0	1	1	0	138	5.75	190	6.17	5.8	79	5.72	231	4.18	0.98	2.72	1.2	21.39	1
430	0	80	83.7	160.5	32.4919	147	65	112	0	0	1	1	0	128	9.89	311	6.98	6.5	79	3.99	455	5.42	1.66	3.74	1.17	14.41	1
431	1	86	65.5	158.5	26.0725	168	85	100	0	0	1	1	0	134	5.71	196	5.68	6	112	7.31	425	3.7	1.17	2.31	1.15	21.81	1
432	1	71	66.8	161.5	25.6113	127	74	89.5	1	0	1	1	0	170	6.93	295	5.62	5.7	75	6.04	432	5.67	1.15	3.88	1.2	11.89	1
433	0	71	51.9	158	20.7899	120	64	81	0	0	1	1	0	145	5.65	281	6.45	6	50	8.03	240	7.17	0.82	4.92	1.67	9.86	0
436	0	65	72.9	172.5	24.4991	142	69	83.5	0	0	1	0	0	138	6.09	230	6.93	6	87	5.44	276	7.36	2.29	5.1	1.35	12.92	1
437	0	82	58.9	146.5	27.4435	161	84	89	0	0	1	1	0	141	9.6	256	7.24	6	67	4.71	371	5.23	1.57	3.44	1.34	14.11	1
441	0	72	67.4	153.5	28.6051	136	78	97	0	0	1	1	0	134	7.67	343	5.18	5.7	54	5.76	286	6.56	2.39	4.26	1.56	10.11	1
442	1	71	70	169	24.5089	111	66	93	0	0	1	1	0	136	4.87	204	5.14	6.1	88	8	393	4.8	0.49	1.97	2.43	12.67	0
443	0	68	70.4	155	29.3028	138	77	100	0	0	1	0	0	134	5.24	179	5.45	6.5	79	5.57	466	6.4	1.86	3.66	1.08	14.73	1
444	1	69	74	170	25.6055	161	79	95	0	0	1	1	0	145	5.85	187	4.46	5.8	88	5.58	422	4.45	2.01	2.29	0.99	18.05	0
446	1	74	70.6	179	22.0343	147	93	90	0	0	1	1	0	150	5.86	198	4.32	5.8	77	6.54	237	3.11	0.56	1.38	1.38	21.56	0
447	1	69	65.4	168.5	23.0345	140	82	85	0	0	1	1	0	159	6.04	217	5.65	5.7	90	4.83	293	7.22	0.68	3.89	2.21	12.79	0
448	1	65	65	171.5	22.0996	122	79	70	1	0	0	1	1	123	9.02	155	5.64	5.5	213	18.67	561	2.71	2.09	1.37	0.8	29.61	1
450	1	79	68.6	168	24.3056	128	69	93	0	0	0	1	1	122	7.71	313	12.35	7.4	128	5.16	399	4.72	2.34	3.38	0.6	38.95	1
451	1	76	68.1	166.5	24.5651	146	86	97	0	0	0	1	0	147	6.6	133	4.68	5.4	85	5.99	395	6.37	2.52	3.99	1.04	23.73	1
452	0	78	55.4	155.5	22.9113	149	71	77.5	0	0	0	1	1	134	3.8	238	5.36	5.4	80	7.19	317	7.19	0.96	4.7	1.78	19.16	1
454	1	72	45.1	157.5	18.1809	123	74	75	1	0	0	0	0	132	6.08	198	4.75	5.9	64	9.46	236	5.67	0.56	3.43	1.76	15.81	0
455	1	78	62	160	24.2188	142	70	86	1	0	0	0	0	141	9.93	219	4.73	6	124	7.77	325	2.86	2.27	1.16	0.68	15.68	0
456	1	68	59.5	170	20.5882	111	71	85	0	0	0	0	0	147	5.63	191	5.59	5.9	70	5.42	359	3.84	0.81	2.21	1.48	15.01	0
457	1	69	68.7	167.5	24.4865	165	81	111	1	0	0	0	0	151	10.08	353	5.69	6	114	7.09	349	4.75	2.18	3.06	0.71	23.01	1
458	0	69	59.2	149	26.6655	157	93	89	0	0	0	1	0	136	3.71	127	8.24	5.7	77	5.06	292	7.43	1.81	4.61	1.55	14.09	1
459	1	65	55.1	161	21.2569	123	76	83	0	0	0	0	1	144	6.33	257	7.81	7.4	111	9.33	392	2.99	0.69	1.6	1.07	18.37	1
460	0	66	64.8	162.5	24.5396	125	63	83	0	0	0	1	1	124	4.77	201	5	6.5	64	5.6	275	3.2	0.67	1.2	1.94	16.88	1
461	1	85	73	162	27.8159	144	65	92	1	0	0	0	0	142	7.16	307	5.77	6.5	86	4.79	453	5.56	2.35	3.35	0.87	17.82	1
463	0	72	44.3	139	22.9284	117	75	83	0	0	0	0	1	105	6.59	405	8.8	8.6	53	3.24	245	4.12	3.12	2.08	0.84	10.09	0
465	0	77	45.4	144	21.8943	134	66	87	0	0	0	1	0	138	8.21	266	7.81	7	76	5.81	452	3.94	3.13	1.89	0.96	20.73	1
466	1	82	62.5	165	22.9568	108	58	88.5	0	0	0	0	1	150	5.25	218	7.57	7.5	93	5.72	400	3.25	1.28	1.96	1.09	13.51	0
467	0	73	56.2	143	27.483	144	71	78	0	0	0	0	0	123	6.27	317	5.68	5.7	70	6.73	405	6.28	1.15	3.8	1.77	19.02	0
468	0	74	53.2	145.5	25.1296	134	67	95	0	0	0	0	0	130	6.05	283	5.6	5.9	63	3.75	336	5.92	1.85	4.01	1.22	13.27	0
469	1	67	72	168	25.5102	146	71	91	1	0	0	0	0	133	6.83	193	5.17	5.5	107	6.49	417	5.82	0.86	3.52	1.54	15.64	1
470	0	72	51.2	147.5	23.5335	162	78	78.5	0	0	0	1	0	100	7.04	298	6.02	6	59	6.44	207	5.05	0.99	3.45	1.1	12.51	1
471	0	71	54.8	154	23.1068	130	74	77	0	0	0	0	1	127	5.94	213	8.75	7.1	65	5.97	368	6.32	1.55	4.31	1.35	13.67	1
472	0	72	40.4	139.5	20.7603	134	77	71	0	0	0	1	0	132	5.18	266	5.44	5.9	63	7.13	192	5.66	1.48	3.44	1.64	14.06	1
473	0	66	50	147.5	22.9819	113	70	83	0	0	0	0	0	124	4.54	296	5.26	6.1	49	6.02	418	6.11	0.76	3.93	1.65	10.58	1
474	0	67	50	153.5	21.2204	150	73	75.5	0	0	0	0	0	126	6.03	275	5.38	5.7	68	4.81	280	5.02	2.14	3.49	1.09	11.31	1
475	0	65	61.3	158	24.5554	148	77	89	0	0	0	0	0	133	4.57	241	6.09	5.4	53	3.3	386	5.13	1.19	3.6	1.2	9.97	1
476	1	72	60.9	162.5	23.0627	139	65	80	0	25	0	1	0	144	6.44	163	6.1	6.1	65	4.9	257	3.46	1.17	1.86	1.18	18.85	1
477	0	65	51.4	153.5	21.8146	125	63	79	0	0	0	0	0	131	7.96	268	5.33	5.4	54	5.34	343	4.06	1.14	2.55	1.17	13.42	1
478	0	71	63.2	150.5	27.9026	132	61	85	0	0	0	0	0	134	4.9	206	4.8	5.4	55	3.88	308	5.93	1.64	3.42	2.05	10.43	0
479	1	67	63	162.5	23.858	156	92	85	0	0	0	1	1	124	5.81	246	7.99	6.9	68	6.8	272	3.44	0.94	1.41	0.98	15	1
481	0	68	53.8	152	23.286	116	77	95	0	0	0	0	0	130	7.92	295	4.81	5.4	53	5.66	199	3.96	1.19	1.91	1.72	12.14	1
482	1	69	60.1	162.5	22.7598	156	88	82	0	0	0	0	0	138	3.25	163	5.44	5.4	82	7.4	215	4.51	0.82	2.49	1.45	19.94	1
483	1	70	47.5	167.5	16.9303	99	66	74.4	0	0	0	0	0	148	6.57	165	4.58	5.6	63	5.44	291	4.61	0.76	2.16	1.38	11.08	0
485	1	70	56.4	159.5	22.1696	116	62	79	1	0	0	0	0	151	5.8	259	5.28	6.1	76	7.21	331	5.07	1.79	2.8	1.55	12.82	0
486	0	68	54.9	148.5	24.8954	104	60	92	0	0	0	0	0	128	5.06	176	5.24	5.7	61	4.22	302	5.79	2.61	3.81	0.92	11.37	0
488	1	67	56.3	152	24.3681	99	66	74	1	0	0	0	0	128	7.37	318	4.5	5.9	126	9.97	585	4.91	0.91	2.73	1.64	22.7	0
489	0	66	56.3	164	20.9325	115	71	72	0	0	0	1	0	128	5.35	250	5.45	6.3	82	6.62	474	4.87	2.87	2.37	1.21	15.9	1
491	1	69	62.1	170	21.4879	138	82	91	0	0	0	0	0	140	5.83	270	5.5	6.1	55.9	5.5	271.53	5.69	0.73	3.56	1.74	10.87	0
492	1	67	61.9	166.5	22.3286	157	81	83	0	0	0	0	0	155	6.14	174	6.14	5.9	71	5.98	350	5.15	1.44	2.47	1.62	22.47	0
493	0	92	52.2	138	27.4102	118	70	93	0	0	0	0	0	128	6.38	537	8.65	6.9	61	5.39	419	5.43	3.55	2.85	1.77	12.53	1
494	1	76	55.3	160.5	21.4672	125	63	84	1	25	0	0	0	147	6.52	306	4.37	5.7	68	4.11	435	5.1	1.13	3.3	1.47	14.1	1
495	1	65	47.2	157.5	19.0275	125	76	74	1	0	0	0	0	130	4.7	189	4.92	5.6	90	5.71	271	4.31	0.47	2.21	1.39	20.23	0
496	1	70	65	173	21.7181	142	92	87	0	0	0	1	1	155	8.7	174	8.63	7	87	5.53	412	2.9	3.82	1.25	0.57	14.69	1
497	0	69	59.5	150.5	26.269	158	88	90	0	0	0	1	0	131	4.77	185	5.51	5.8	69	7.65	378	5.13	1.68	2.36	1.5	17.23	1
498	0	70	64.3	151	28.2005	141	86	88	0	0	0	0	0	140	8.25	319	4.17	5.7	77	3.76	302	4.75	3.85	2.36	0.78	41.98	1
499	0	66	45	144	21.7014	144	87	74	0	0	0	1	0	148	11.39	363	4.66	6.9	72	3.78	318	4.17	1.79	2.18	1.07	16.68	0
500	1	79	69.4	162	26.4441	146	72	98	0	0	0	0	0	133	9.24	178	8.66	6.4	108	7.01	360	5.47	1.47	2.96	1.47	14.02	1
501	1	74	68	170	23.5294	124	67	86	0	0	0	0	0	120	6.36	150	4.32	5.5	102	9.62	613	4.03	0.86	2.33	0.88	56.07	0
502	0	70	50	145	23.7812	116	55	53	0	0	0	0	0	131	5.07	239	4.68	5.6	53	3.76	227	4.88	0.85	2.39	1.83	11.28	0
504	1	94	57.9	165	21.2672	126	60	76	1	0	0	0	0	138	4.87	164	5.38	5.9	155	10.93	485	5.11	1.07	2.74	1.45	29.74	0
505	1	67	65.4	166	23.7335	151	95	89	0	0	0	0	0	127	6.07	232	5.13	5.8	75	4.43	351	4.94	0.52	2.58	1.57	35.81	0
506	0	78	55	145	26.1593	183	78	84	0	0	0	1	0	139	7.02	295	6.63	7	60	3.26	336	6.28	1.26	3.31	1.62	15.28	1
507	0	67	53.5	144	25.8005	124	74	83	0	0	0	0	0	115	3.29	102	4.67	4.9	51	5.32	235	4.15	0.91	2.17	1.2	7.94	0
509	0	85	49	160	19.1406	170	99	79	0	0	0	1	0	124	5.39	289	4.68	5.4	67	7.46	276	5.23	1.01	2.39	1.95	28.27	0
510	1	87	35	150	15.5556	133	75	65	0	0	0	1	0	135	6.34	246	5.48	5.9	62	5.14	413	5.12	1.47	2.34	2.03	51.99	0
511	0	86	40.5	142	20.0853	133	60	75	0	0	0	0	0	123	4.95	177	4.41	5.4	49	5.28	274	4.68	0.78	2.37	1.6	31.6	0
512	0	87	48.9	165	17.9614	130	76	79	0	0	0	0	0	125	5.13	165	4.21	5.4	71	5.76	222	7.3	1.06	4.32	1.25	25.71	0
513	0	77	45	150	20	150	69	80	0	0	0	1	1	128	6.5	315	4.8	5.4	69	5.09	262	5.34	1.28	3.02	1.27	9.49	0
514	0	94	50.8	153	21.7011	147	69	80	0	0	0	0	1	133	7.25	236	5.73	6.3	45	5.55	205	9.62	1.21	1.49	6.09	19.44	0
515	0	90	50.6	155	21.0614	134	78	84	0	0	0	1	1	116	6.63	218	5.4	5.2	52	5.89	188	3.83	1.66	1.93	0.92	21.84	0
516	0	90	49.8	160	19.4531	131	89	80	0	0	0	1	0	144	5.93	253	6.78	6.2	46	3.99	185	5.19	0.61	2.45	1.98	21.13	0
517	0	93	55	165	20.202	118	80	87	0	0	0	1	1	112	4.5	235	7.23	6.2	65	11.11	377	5	1.33	2.42	1.56	29.68	0
518	0	81	45	153	19.2234	138	78	78	0	0	0	1	0	117	6.41	279	4.86	5.2	81	7.36	260	3.53	0.7	1.32	1.65	22.52	0
520	0	70	60	150	26.6667	180	90	89	0	0	0	1	0	115	6.75	333	4.4	4.9	64	4.34	265	6.59	0.98	3.66	1.59	19.45	0
521	0	88	50	155	20.8117	134	69	75	0	0	0	1	1	105	4.56	226	5.83	6.3	94	10.34	331	5.52	1.32	2.82	1.63	45.5	0
522	0	88	44.2	140	22.551	148	64	86	0	0	0	1	0	136	4.96	166	4.53	5.6	58	4.06	383	4.8	1.15	2.08	1.98	23.6	0
523	0	85	45	160	17.5781	157	60	74	0	0	0	1	1	100	2.98	159	5.78	6.5	64	9.22	372	4.29	0.81	2.37	1.16	23.85	0
524	1	65	57.3	157.5	23.099	124	86	87	1	0	0	1	0	149	5.75	218	4.42	5.4	95	4.08	465	6.92	1.58	4.27	1.22	63.1	0
525	0	66	58.6	151	25.7006	177	90	88	0	0	0	1	0	122	6.3	312	5.33	6.1	62	4.18	291	7.83	2.47	4.68	1.11	15.14	1
526	0	66	61.3	147	28.3678	116	74	101.5	0	0	0	1	0	130	6.72	286	4.09	6.5	67	7.08	352	4.01	1.72	2.14	0.85	9.06	0
527	0	67	70.7	158.5	28.1424	135	67	100	0	0	0	1	1	134	9.39	215	4.93	6.1	66	4.91	337	6.74	1.5	3.36	2.25	22.79	1
528	1	66	54.7	155	22.768	130	74	82	0	0	0	0	0	140	7.66	297	5.64	5.8	68	7.45	446	5.93	1.88	3.12	1.54	12.08	1
530	0	64	56.3	156	23.1345	143	88	81	0	0	0	0	0	114	5.32	330	4.81	5.8	60	6.62	374	6.72	1.52	3.43	1.81	12.01	1
531	0	70	61	147.5	28.0379	122	70	88	0	0	0	0	0	147	7.39	259	5.31	6.1	53	5.46	332	5.66	1.14	3	1.58	12.05	1
532	1	67	52.2	165	19.1736	116	73	76	0	0	0	0	0	137	9.06	181	4.48	5.4	83	7.86	323	6.26	0.55	3.28	1.92	14.47	0
533	0	70	68	147.5	31.2554	128	75	98	0	0	0	1	1	118	9.13	274	6.79	6.4	103	9.13	292	4.03	1.68	1.91	1.24	18.19	1
534	0	67	61.7	157	25.0314	134	84	101	0	0	0	0	1	130	5.86	252	9.51	7.5	61	6.44	412	6.93	1.69	4.13	1.37	11.28	0
535	0	81	59.7	156.5	24.3751	198	92	92	0	0	0	1	0	138	3.85	199	6.79	6.8	85	4.4	453	11	2.15	7.05	1.11	22.31	1
536	0	78	64.4	150.5	28.4324	145	69	100	0	0	0	1	0	111	4.2	194	4.99	5.6	72	5.8	407	6.83	1.38	3.86	1.2	20.59	0
537	0	74	52.8	157	21.4207	145	73	84	0	0	0	0	0	123	7.91	200	4.98	5.8	69	4.41	386	5.28	1.64	2.75	1.36	17.11	0
538	0	66	61.4	147	28.4141	158	81	98	0	0	0	1	0	108	7.21	360	7.49	7.5	54	5.81	294	5.54	3.37	3.13	0.75	11.7	1
539	1	69	63.2	154	26.6487	138	75	93	0	0	0	0	0	153	4.43	207	5.31	5.9	75	6.1	401	5.61	1.35	3.02	1.35	19.69	1
540	1	69	74.3	161	28.664	152	86	98	1	5	0	0	0	177	6.16	211	5.19	5.4	82	5.98	368	4.02	1.28	2.44	1.31	13.12	0
541	1	68	69	168.5	24.3024	120	64	90	0	0	0	0	0	149	6.02	213	5.86	6	84	5.48	350	6.1	0.95	4.26	1.31	13.8	0
542	0	87	57.1	147.5	26.2453	127	61	100	0	0	0	1	0	121	5.25	195	5.15	5.5	86	4.61	372	4.08	1.17	2.41	1.46	13.24	0
543	0	65	64	162	24.3865	117	65	87	0	0	0	0	0	123	5.41	342	5.82	5.9	58	4.12	247	3.94	1.57	2.24	1.61	11.59	1
544	0	68	59.1	160	23.0859	150	90	80	0	0	0	1	1	161	6.8	187	13.64	9.1	46	5.13	324	4.76	2.08	3.22	1.13	11.87	1
545	0	66	59.5	150.5	26.269	152	74	92	0	0	0	1	0	129	9.76	243	7.18	7.3	58	5.38	346	5.95	1.25	3.55	1.97	9.8	1
546	0	67	51	147.5	23.4415	129	64	77	0	0	0	0	0	129	9.73	276	5.46	5.7	56	5.95	380	4.79	1	3	1.21	9.16	1
549	0	65	64.7	160.5	25.1162	123	71	82.5	0	0	0	0	0	127	4.54	244	5.59	6.3	53	4.85	332	4.52	1.38	2.95	1.14	10.65	1
550	0	71	74.9	165	27.5115	161	68	98	0	0	0	1	1	125	5.36	215	6.7	5.9	71	7.82	338	4.95	0.89	2.64	1.22	13.25	1
551	0	69	42.9	146	20.1257	123	59	78	0	0	0	0	0	130	4.52	80	6.31	5.4	67	4.42	274	4.43	0.89	2.54	1.82	20.47	0
552	0	69	51.3	150.5	22.6488	125	77	87	0	0	0	0	0	136	5.18	341	6.14	5.8	55	4.44	386	6.18	2.68	4.19	1.1	24.52	1
553	0	71	67.3	148	30.725	146	62	98	0	0	0	1	0	115	5.4	216	5.01	5.6	39	4.45	221	4.87	2.17	2.49	0.99	10.55	0
554	0	68	62	156.5	25.3141	117	64	90	0	0	0	1	0	138	6.65	233	5.48	6.1	51	4.91	337	4.17	1.24	1.82	1.66	11.01	1
555	1	69	67.8	156	27.86	163	88	93	0	0	0	1	0	142	7.39	210	5.26	5.4	82	6	364	5.94	1.69	3.44	0.95	19.32	1
556	0	70	49.5	154.5	20.7371	167	77	80	0	0	0	0	0	103	3.91	200	4.87	5.6	79	6.4	312	4.91	1.25	2.28	1.71	12.42	0
557	0	67	84.1	159	33.2661	142	91	103	0	0	0	0	0	133	5.95	229	5.08	5.9	49	5.92	372	5.68	2.26	3.67	1.25	8.66	1
558	1	70	52.9	157	21.4613	131	75	73	0	0	0	0	0	170	7.99	249	5.03	4.3	82	5.51	384	3.94	0.83	2.17	1.55	17.88	0
559	0	68	51.5	154	21.7153	143	81	79	0	0	0	0	0	134	6.16	257	5.35	6.5	71	8.32	278	5.22	1.36	3.37	1.18	15.91	1
560	1	66	80.4	172.5	27.0195	126	77	94	1	0	0	0	0	162	9.28	178	8.82	8.7	104	7.1	420	5.1	1.86	3.21	1.18	15.82	1
561	1	73	90.4	172.5	30.3802	132	62	110	0	0	0	1	0	167	7.84	230	5.04	6.2	153	11.23	97	3.39	1.12	1.98	1.1	20.32	1
562	1	67	59.8	172	20.2136	140	83	82	0	0	0	0	0	141	6.09	263	4.93	5.4	68	3.88	260	5.26	0.94	3.28	1.32	21.73	0
563	0	72	53	158	21.2306	120	71	79	0	0	0	0	0	134	4.45	144	6.02	6.1	58	5.22	356	5.86	0.82	3.02	2.31	9.68	0
564	0	81	58.7	150	26.0889	140	73	86	0	0	0	0	0	128	4.24	159	6.43	6	68	5.68	402	6.63	1.6	4.4	1.42	12.24	1
565	0	71	69.9	158.5	27.8239	139	71	89	0	0	1	0	0	131	6.69	214	5.9	6	69	6.64	380	5.73	1.1	3.39	1.14	11.09	1
566	1	72	64.9	173	21.6847	137	89	79	0	0	1	0	0	155	7.84	201	4.9	5.3	88.51	5.6	385.78	5.85	1.93	3.99	1.17	26.39	0
568	0	72	56	146	26.2713	142	74	85	0	0	1	1	0	128	8.06	294	6.55	6.7	67	5.08	528	4.98	1.4	2.86	0.86	19.64	1
571	0	74	71	156	29.1749	165	82	89	0	0	1	1	0	153	6.95	333	8.04	6.9	52	5.67	420	6.83	3.73	4.02	1.52	9.07	1
573	0	78	60	158	24.0346	138	62	84	0	0	0	1	1	141	6.96	237	9.28	7.2	74	6.54	397	3.63	1.16	2.14	0.96	14.36	1
574	0	68	72.8	163.5	27.233	150	83	98	0	0	1	1	0	139	6.74	270	5.83	6.9	55	55	337	5.26	1.6	3.03	1.64	11.66	0
577	0	68	60.9	156.5	24.865	145	83	81	0	0	0	0	1	139	5.58	227	7.33	7.1	44	6.06	318	7.12	1.56	4.59	1.41	18.6	0
578	1	99	47	150	20.8889	164	66	76	1	0	1	0	0	130	3.33	87	4.92	5.4	68	7.85	309	4.58	0.57	2.59	1.6	29.34	0
579	0	78	59	152	25.5367	145	70	90	0	0	0	0	0	137	4.66	180	4.97	5.9	54	5.28	259	5.8	0.91	3.48	1.97	11.36	0
581	1	71	66.5	166	24.13	136	70	87	1	0	1	1	1	149	6.35	229	7.03	9.4	97	8.69	337	3.34	1.75	1.79	1.22	17.29	0
582	1	68	66	166	23.95	117	68	87	1	0	1	1	1	157	7.48	161	6.77	6.4	62	8.83	364	6.22	0.93	4.07	1.4	10.66	0
583	0	69	63.7	161.5	24.42	131	76	83	0	0	1	1	0	138	5.44	234	5.29	5.8	76	6.36	293	5.09	1.35	3.04	1.4	10.88	0
584	1	66	58.4	168.5	20.57	149	88	74	1	0	1	0	1	124	6.6	191	12.51	10.3	86	9.21	385	5.06	1.33	3.31	1.11	17.39	0
585	0	71	66.9	150.5	29.54	158	71	98	0	5	1	1	0	133	4.73	234	7.88	6.5	60	6.5	430	5.83	1.78	3.74	1.46	13.56	1
586	1	66	76.3	164.5	28.2	145	83	94	0	0	1	1	0	151	6.32	227	7.2	7	87	6.54	550	5.61	2.37	3.51	1.23	17.37	0
587	0	83	62.2	154.5	26.06	158	71	62.2	0	0	1	1	0	126	5.66	200	5.09	5.9	47	5.88	317	5.53	0.7	3.19	1.93	12.6	0
588	0	65	61	165	22.41	104	60	81	0	0	1	1	0	124	4.09	205	5.41	5.5	73	8.84	305	3.19	1.11	1.71	1.28	16.14	0
590	0	66	69	161	26.62	135	66	90	0	0	0	0	0	139	3.49	190	4.98	5.6	51	6.21	292	6.06	0.69	3.88	1.6	10.43	0
591	1	70	55.6	173.5	18.74	126	76	85	1	0	1	0	1	145	6.93	222	15.75	9.1	75	7.97	434	4.31	0.74	2.65	1.37	16.14	0
592	0	67	56.8	160	22.19	163	87	80	0	0	1	0	0	126	5.68	260	5.43	6.3	60	5.94	337	6.11	2.41	3.82	1.34	14.33	1
593	1	76	80	182	24.15	123	74	94	1	0	1	1	0	164	6.64	380	6.55	6.6	89	5.43	439	6.54	2.18	4.19	1.25	23.01	0
594	0	76	41	156	16.85	112	76	70	0	0	0	1	0	119	8.52	261	4.94	5.6	68	8.24	339	6.29	2.12	3.92	1.56	12.38	0
595	0	72	54.9	151	24.08	144	75	80	0	0	0	0	0	149	7.9	199	5.98	6.2	61	4.7	304	5.78	3.67	3.53	1.23	10.71	1
596	0	76	48.7	151	21.36	118	65	83	1	0	1	1	0	122	4.51	233	6.13	6.1	56	3.93	232	5.62	0.76	3.34	1.83	20.21	0
597	0	71	42	154.5	17.6	132	82	74	0	0	1	0	0	133	5.64	143	4.79	5.5	62	5.75	320	6.38	1.9	3.7	1.76	17.16	0
599	0	67	53.6	151.5	23.35	146	77	84	1	0	1	1	0	136	3.18	213	5.62	6.3	51	4.32	358	6.97	2.19	4.07	1.75	17.42	1
600	1	65	59.2	168	20.98	107	71	79	0	0	1	0	0	129	6.69	224	4.41	5.6	98	8	303	6.35	1.04	3.88	1.41	25.41	0
601	1	79	59	163	22.21	126	63	80	0	0	1	0	0	138	7.37	238	4.89	6	94	5.51	328	5.69	1.41	3.35	1.43	21.15	0
603	1	68	54.5	179.5	16.88	127	80	71	1	25	1	0	0	121	5.03	182	4.12	5.8	112	5.58	484	4.31	0.78	2.25	1.54	29.78	0
605	0	67	54.9	150	24.4	131	89	86	0	0	1	1	1	136	5.51	255	4.64	6.2	65	4.02	326	5.56	2.06	3.29	1.43	14.93	0
607	1	65	57.3	175	18.71	120	78	74	0	0	1	0	1	125	6.6	169	4.31	5.6	62	7	404	7.67	1.29	3.97	2.7	14.01	0
608	0	67	59.5	160.5	23.1	134	75	76	1	0	1	0	0	123	5.16	161	4.62	6.4	71	6.13	366	6.52	3.56	3.71	1.44	10.25	0
609	0	73	63.2	158	25.32	122	78	87	0	0	1	0	0	139	8.41	320	6.03	6.3	71	5.39	339	6.12	1.34	3.74	1.31	20.48	1
610	0	72	64.8	162	24.69	108	61	86	0	0	1	1	0	147	6.43	247	5.27	6	56	4.62	312	7.3	0.94	4.51	1.62	9.93	1
611	1	72	59.7	168.5	21.03	137	81	85	0	0	1	1	0	140	8.62	239	4.75	5.5	114	8.61	441	3.82	0.56	1.85	1.54	16.22	0
612	1	68	41.7	155.5	17.25	106	61	62	1	0	1	0	0	142	4.81	256	4.31	5.6	111	7.63	429	5.73	1.26	3.21	1.56	26.43	0
613	1	80	79.4	173	26.53	138	79	95	0	0	1	0	0	141	5.65	204	4.69	5.7	88	6.37	442	6.25	0.85	3.73	1.59	14	0
614	0	79	65.8	161.5	25.23	147	74	85	0	0	1	0	0	135	4.47	156	5.03	5.8	71	7.32	400	5.99	1	3.32	1.85	16.47	1
615	0	78	46.5	158	18.63	165	80	79	0	0	0	1	0	132	5.33	239	4.98	5.9	74	7.06	277	5.45	0.98	3.03	1.6	11.75	0
616	1	72	63.5	169.5	22.1	131	78	80	1	0	1	0	1	161	6.18	226	5.69	5.69	72	4.93	191	6.22	1.5	3.8	1.33	11.82	0
617	0	65	60.5	154	25.51	122	73	77	0	0	1	0	0	146	5.21	198	4.41	6.3	69	5.04	471	7.92	1.13	4.79	2.01	18.87	0
618	1	69	65.6	167	23.52	120	60	80	1	10	1	0	0	131	5.27	188	7.33	6.7	79	5.67	420	8.39	1.09	4.42	2.88	16.1	0
619	0	66	52.7	155	21.94	140	67	75	0	0	0	0	0	147	5.54	307	4.61	5.8	49	7.94	261	7.35	1.6	4.49	1.6	19.79	1
621	1	72	71.8	163	27.02	155	95	97	1	0	1	0	0	157	7.96	196	5.9	5.6	71	5.21	294	6.41	1.35	3.79	1.59	14.25	1
622	0	69	60.7	150.5	26.8	176	80	84	0	0	0	0	0	125	3.79	245	5.06	5.5	57	4.6	284	5.71	0.97	3.27	1.57	17.3	1
623	1	67	54	162.5	20.45	133	74	81	1	0	0	0	0	155	3.77	239	5.25	5.3	63	3.56	257	5.36	0.52	2.94	1.82	22.34	0
624	0	70	50.5	158.5	20.1	131	78	75	0	0	1	1	0	128	7.79	296	4.8	5.8	71	5.58	302	6.14	1.73	3.51	1.69	12.64	0
625	0	72	66	162	25.15	125	61	91	0	0	1	1	1	126	3.87	206	6.68	7.5	65	7.28	268	4.82	0.92	2.47	1.81	11.62	0
626	1	70	63.9	158	25.6	122	82	94	0	0	1	0	0	153	5.45	250	5.68	6.2	136	5.91	334	7.01	1.14	4.24	1.53	18.19	0
627	0	67	65.9	165	24.21	116	66	78	0	0	1	0	0	146	4.67	104	4.74	5.3	58	5.76	310	5.11	1.06	2.67	1.78	11.65	0
628	0	89	60	159.5	23.58	134	81	88	0	0	1	1	0	120	6.67	146	7.03	6	52	6.1	343	6.6	1.37	3.64	0.98	12.56	0
629	0	84	51.6	152.5	22.19	148	73	85	0	0	1	0	0	120	3.56	143	7.65	5.6	74	4.23	222	4.61	0.94	2.34	1.83	22.88	0
631	1	68	52.2	169	18.28	99	63	75	0	0	1	0	0	145	4.96	171	5.9	6	95	5.29	388	4.12	0.98	2.47	1.24	10.68	0
632	1	71	57.4	167	20.58	145	67	73	0	0	1	0	0	137	9.55	202	5.58	5.8	81	6.32	331	6.54	0.88	3.93	1.66	20.6	0
633	0	69	84.8	156	34.85	132	84	106	0	0	1	1	1	146	8.94	175	7.04	7	76	4.62	382	4.29	1.75	2.33	1.37	13.87	1
634	0	71	73.7	164	27.4	147	75	98	0	0	0	0	0	138	6.35	241	5.18	6	75	5.65	309	6.09	2.36	3.55	1.56	15.04	0
635	0	71	56.3	155	23.43	121	63	80	0	0	0	0	0	139	4.94	267	6.52	6.5	62	6.03	246	8.51	2.05	5.49	1.65	17.6	1
636	0	76	50.9	154.5	21.32	140	79	77	0	0	1	0	0	136	7.8	298	5	5.6	50	6.1	208	7.03	1.25	4.32	1.55	10.31	0
637	0	69	60.4	160	23.59	102	60	84	0	0	1	0	0	125	4.16	230	4.36	5.4	63	4.92	321	6.37	0.69	3.58	1.97	14.99	1
638	0	84	63.2	144	30.48	145	77	103	0	0	1	0	0	130	6.47	214	6.18	6	87	10.45	588	4.2	1.32	2.36	1.21	13.02	1
639	0	67	51	153	21.79	112	61	71	0	0	1	0	0	124	4.4	278	4.38	5.9	67	6.81	243	5.49	0.71	2.75	2.17	12.07	0
640	0	88	46	139.5	23.64	127	64	79	0	0	1	0	0	131	5.19	368	4.93	5.8	73	6.88	248	5.95	1.28	3.27	1.86	17.32	0
641	0	76	79	158	31.65	154	80	102	0	0	1	1	1	132	6.93	198	17.69	7.8	70	6.59	419	4.33	3	2.37	1.31	17.57	1
642	0	66	57.4	153	24.52	135	80	82	0	0	1	0	0	141	5.16	258	5.47	5.8	65	4.69	285	5.99	1.03	3.54	1.61	11.31	0
643	1	74	73	176	23.57	121	79	84	0	5	1	0	0	154	6.52	275	5.03	6.1	76	4.8	282	5.24	1.11	2.88	1.72	15.94	0
644	1	71	74	179	23.1	135	79	88.5	0	0	1	0	1	166	8.61	210	5.81	6.5	85	6.45	359	5.6	1.44	3.52	1.16	15.71	1
645	0	72	51	164	18.96	136	71	84	0	0	1	0	0	139	4.3	202	5.72	6.1	65	6.35	379	6.47	1.91	3.83	1.57	10.66	1
646	1	68	52	164	19.33	100	60	76	1	0	1	0	0	123	4.79	140	5.06	5.5	65	4.52	260	5.2	0.79	2.9	1.65	13.22	0
647	0	66	55	160	21.48	114	62	81	0	0	1	0	0	116	2.98	227	4.96	5.7	60	5.74	241	5.07	0.69	2.66	1.96	10.39	0
648	1	69	59	160	23.05	136	72	83	1	0	1	0	0	148	6.26	217	4.37	5.3	66	2.84	307	4.24	0.9	2.48	1.32	10.65	1
649	1	67	71.4	155	29.72	156	100	95	1	0	1	0	0	148	5.02	226	4.84	5.3	80	6.87	425	5.13	0.93	3.18	1.35	17.64	0
650	0	78	55	159	21.76	136	86	81	0	0	1	0	0	124	4.47	324	6.7	6.8	57	4.26	244	4.79	0.75	2.71	1.69	8.32	0
651	1	71	55	165	20.2	155	82	79	0	25	1	0	0	134	3.16	218	4.16	5.6	94	6.9	263	5.66	1.05	3.73	1.48	14.45	0
652	1	67	81	169	28.36	157	86	95	0	0	1	1	0	134	5.9	340	6.82	7.5	75	4.7	410	3.28	1.18	1.74	1.37	11.06	1
653	0	68	65.8	150.5	29.05	133	86	95.8	0	0	1	1	0	121	5.09	222	4.88	5.9	69	5.67	317	3.47	1.79	1.85	1.5	14.58	1
654	0	72	63.8	150.5	28.17	136	81	91	0	0	1	1	0	144	7.84	225	5.1	6.1	50	5.04	288	7.73	1.03	4.99	1.85	13.46	1
655	1	68	55	159	21.76	128	77	77	0	0	1	0	0	153	8.92	220	4.7	5.4	82	7.73	335	5.12	0.75	3.52	1.46	NA	1
656	0	75	58	157	23.53	134	61	82.5	0	0	1	1	0	131	6.53	258	5.7	6.2	59	4.82	272	4.64	1.75	2.91	1.4	NA	1
657	0	86	51	148	23.28	156	67	77	0	0	1	1	1	107	8.88	275	4.69	6.2	89	10.23	306	4.86	1.12	2.9	1.35	NA	1
658	0	66	64	154	26.99	138	78	87	0	0	1	0	0	128	5.86	343	5.84	5.8	48	4.57	265	7.36	1.3	5.29	1.36	NA	0
659	0	66	47	164	17.47	123	75	64.5	0	0	1	0	0	143	3.18	145	5.2	5.5	69.4	4.03	198.97	4.81	1.15	2.61	1.83	NA	0
661	0	93	46.8	138.5	24.4	159	93	84	0	0	0	0	0	113	4.74	288	4.6	5.4	48	4.3	244	3.71	0.57	2.25	1.23	NA	0
662	0	66	54	160	21.09	107	72	78	0	0	1	0	0	143	4.48	189	4.97	5.8	84	6.31	386	6.08	1.32	3.06	1.29	16.46	0
663	0	76	61	156	25.07	137	69	83	0	0	1	0	1	139	6.52	188	10.45	9.1	64	5.78	234	6.02	0.96	4.04	1.88	NA	1
665	1	65	65	175	21.22	136	79	83	0	0	1	0	0	150	5.83	295	5.93	5.9	58	7.84	300	5.5	2.06	3.9	1.18	17.48	1
666	1	65	66	178	20.83	131	80	82	0	0	1	1	0	136	5.03	205	4.72	5.6	56	5.76	311	8.73	1.89	4.97	1.6	13.69	0
668	1	64	59	161	22.76	122	75	77	0	0	1	0	0	155	9.15	285	6.7	7	70	5.81	285	5.67	1.92	3.84	1.2	NA	0
669	0	65	75	155	31.22	144	98	100.5	0	0	0	1	0	158	8.44	277	5.91	6.5	121	9.2	560	4.4	1.96	2.74	1.4	NA	1
670	0	91	41.6	145	19.65	195	116	75	0	0	1	0	0	124	3.85	126	5.61	5.7	89.1	8.63	307	4.88	0.47	2.42	2.1	NA	0
671	0	69	41	142	20.33	132	67	73	0	0	1	0	0	131	6.25	284	4.42	5.7	75	4.3	386	5.52	2.93	3.51	1.37	NA	1
673	0	72	53	159	20.96	122	75	79	0	0	1	0	0	129	3.85	206	6.05	6.5	63	6.3	320	4.48	1.11	2.33	1.32	10.95	0
677	0	68	59	151	25.88	132	75	81	0	0	1	0	1	135	4.92	248	6.6	7.4	59	5.21	405	4.44	0.9	2.59	1.63	NA	1
678	0	99	55	142	27.28	165	86	93	0	0	0	0	0	147	6.54	225	5.55	5.4	61	4.93	202	5.09	1.72	2.81	1.69	NA	0
679	0	67	54	154	22.77	152	96	78	0	0	1	0	0	134	10.14	207	4.72	6.2	64	3.78	337	4.64	1.01	2.83	1.62	NA	1
680	0	81	50.6	151	22.19	138	70	83	0	0	1	1	0	128	5.13	190	5.5	5.4	56	3.45	246	6.53	1.2	2.47	3.06	8.21	0
681	1	67	62	164	23.05	131	83	85	1	0	1	0	0	139	8.36	269	6.3	5.7	80	6.62	375	5	1.12	3.02	1.19	18.42	1
684	1	66	56.3	152	24.37	112	72	86	1	0	0	0	0	128	7.37	318	4.5	5.9	126	9.97	585	4.91	0.91	2.73	1.64	22.27	0
685	0	68	51	148	23.28	157	92	82	0	0	1	0	0	140	4.96	279	5.88	6.3	58	3.9	256	7.04	1.39	4.53	1.91	NA	0
686	0	69	64	167	22.95	107	64	89	0	0	1	0	1	147	5.02	238	11.2	9.2	64	4.28	421	6.39	3.1	4.55	1.31	NA	1
687	0	65	49	156	20.13	149	80	73	0	0	1	1	1	134	9.37	221	5.69	5.2	81.77	6.04	193.47	5.83	1.36	3.1	1.35	NA	1
689	0	65	55	154	23.19	134	81	84	0	0	1	0	0	131	6.69	224	5.54	5.9	80	6.22	332	5.53	1.34	3.91	1.15	14.86	1
692	0	67	52	159	20.57	104	54	72	0	0	1	1	1	138	4.9	156	8.22	6.5	77	6.07	244	2.82	0.7	1.33	1.29	NA	0
693	0	68	58	156	23.83	117	65	82	0	0	1	1	0	123	6.67	249	4.98	5.7	99	7.12	390	4.3	0.58	2.35	1.81	NA	0
694	0	66	47	146	22.05	147	72	87	0	0	0	1	0	129	8.97	343	5.34	6.5	70	6.18	396	4.42	1.36	2.74	1.26	NA	1
695	0	72	56	150	24.89	167	69	84.5	0	0	1	1	0	120	7.64	382	5.62	6.5	70	4.42	363.77	3.9	1.46	2.13	1.45	NA	1
696	1	81	66	165	24.24	132	62	83	0	0	1	0	0	131	8.83	697	7.14	7.4	89	6.11	467	4.25	0.77	2.66	1.31	NA	0
698	0	67	63	157	25.56	128	71	86	1	0	1	1	1	128	7.97	301	8.71	6.7	59	6.4	423	7.11	1.42	5.61	1.5	NA	0
699	0	65	57.4	154	24.2	130	80	84	0	0	1	0	1	138	8.56	333	13.59	11	62	6.16	296	6.23	0.54	4.24	1.7	NA	0
701	0	82	62	160	24.22	144	79	91	0	0	1	1	0	131	6.68	215	5.8	6.2	89	6.76	312	4.76	1.12	2.23	1.45	13.6	0
702	1	69	60	170	20.76	129	60	80	1	0	1	0	1	148	4.46	192	5.12	5.7	89	5.07	364	6.12	1.8	2.95	1.89	16.53	0
703	1	67	79.8	165.5	29.13	147	95	93	1	0	1	1	0	155	6.29	221	4.7	6.5	89	5.5	665	5.36	2.14	3.74	0.85	12.7	1
704	1	83	70	166	25.4	158	90	93	1	0	1	1	0	146	7.38	352	5.54	6.2	99.1	4.65	394	6.17	2.57	4.2	1.01	17	1
705	0	70	50.8	152.5	21.84	152	81	83	0	0	1	1	0	131	7.92	306	4.4	5.8	48	4.6	353.7	5.11	1.6	3.18	1.67	11.28	1
706	1	74	85.4	176.5	27.41	136	73	100	0	0	1	1	0	151	5.19	173	6.17	5.45	70.59	4.79	479.71	3.78	1.06	1.85	1.09	11.2	1
